# Supplementary material for: Enhanced In Vitro Antiviral Activity of Hydroxychloroquine Ionic Liquids against SARS-CoV-2
Source: MDPI journal article supplement (doi:10.3390/pharmaceutics14040877), 2022-04-17
Supplement: s1 [file s1]

## Supporting Information

### Enhanced In Vitro Antiviral Activity of Hydroxychloroquine Ionic Liquids Against SARS-CoV-2

FTIR spectra

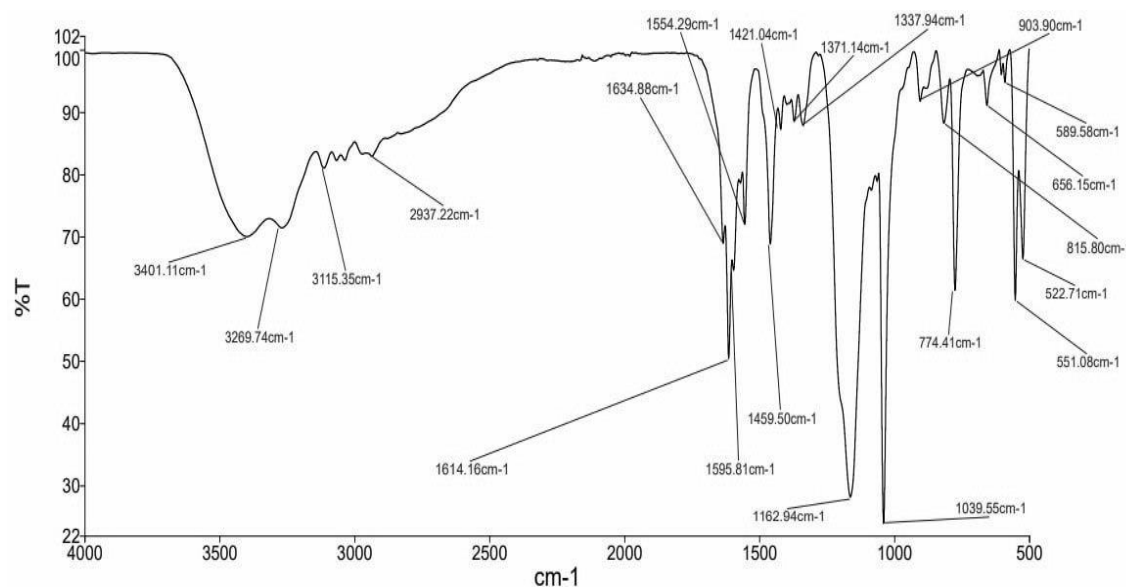

Figure S1. FTIR-ATR spectrum of  $[\text{HCQH}_2][\text{C}_1\text{SO}_3]_2$ .

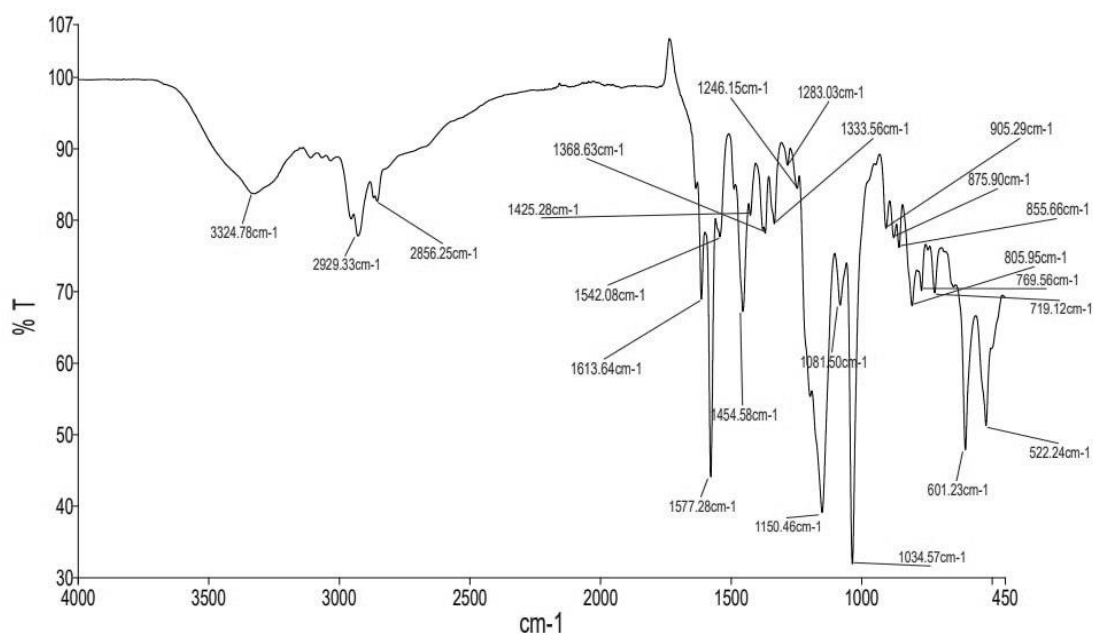

Figure S2. FTIR-ATR spectrum of  $[\text{HCQH}_2][\text{C}_6\text{SO}_3]_2$ .

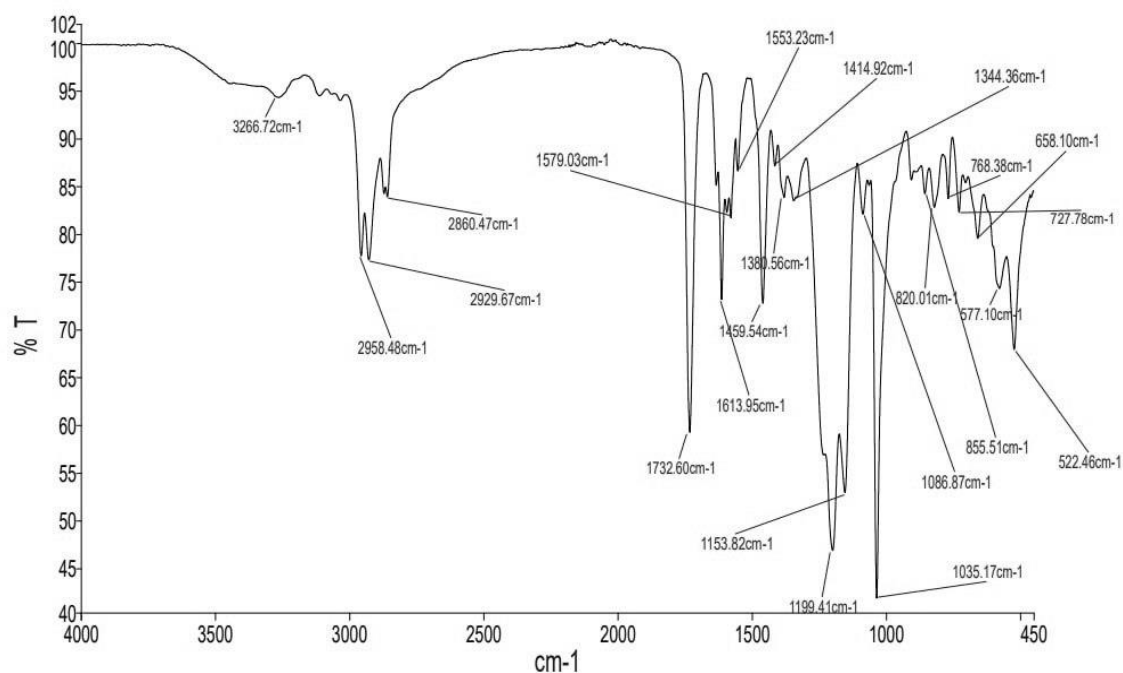

Figure S3. FTIR-ATR spectrum of  $[\text{HCQH}_2][\text{DocSO}_3]_2$ .

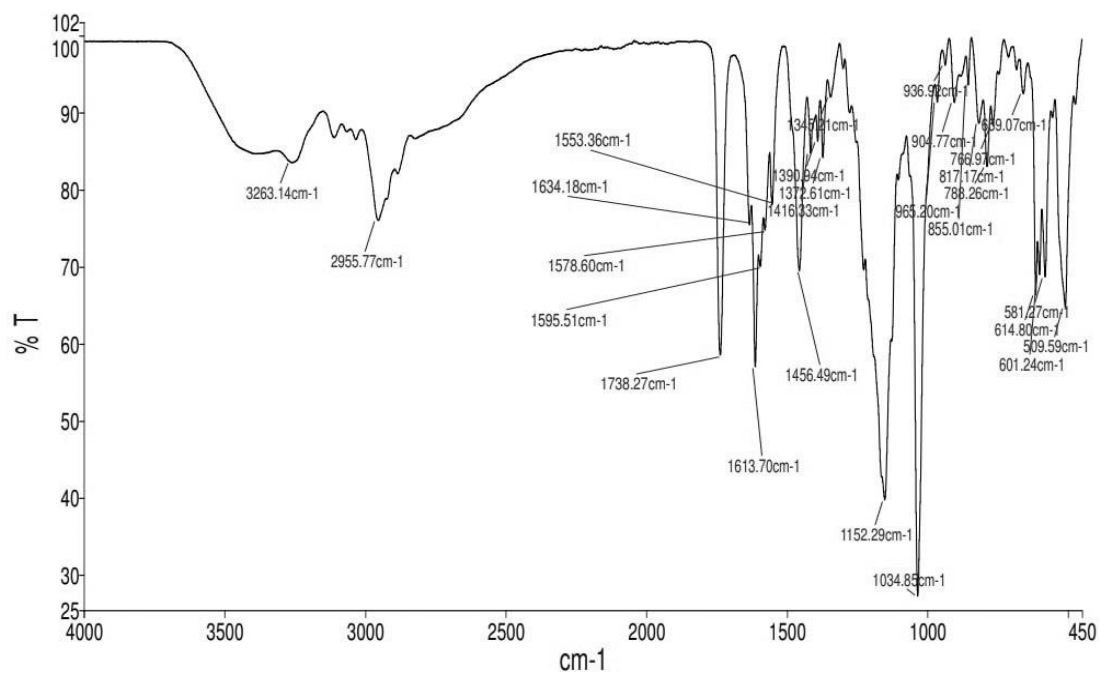

Figure S4. FTIR-ATR spectrum of  $[\text{HCQH}_2][\text{CampSO}_3]_2$ .

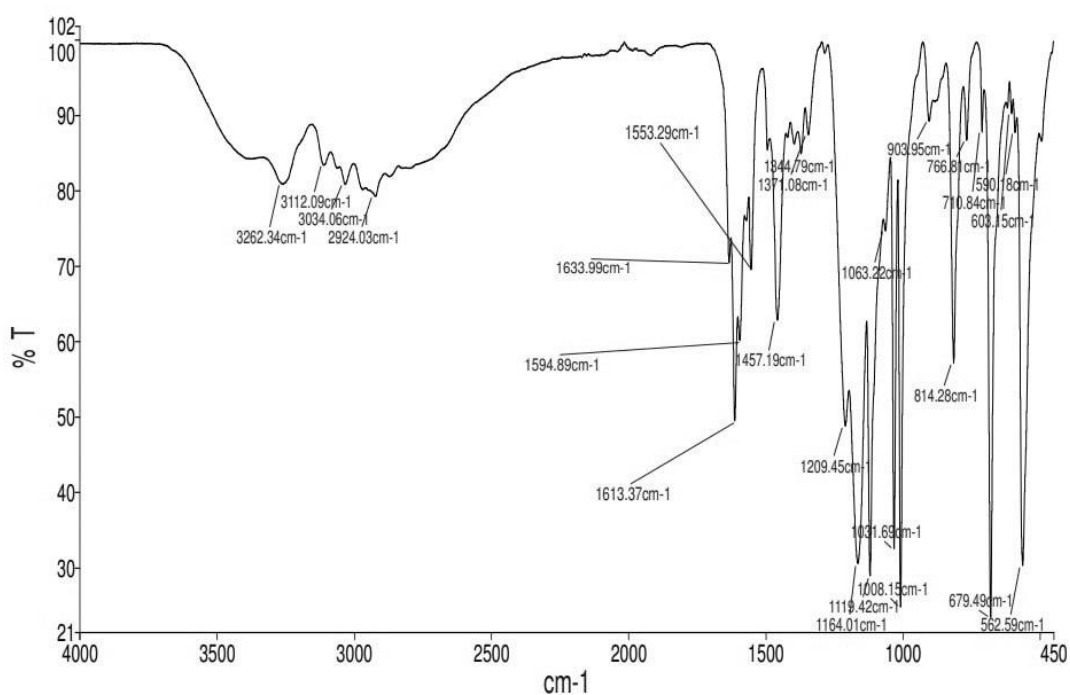

Figure S5. FTIR-ATR spectrum of  $[\text{HCQH}_2][p\text{-TolSO}_3]_2$ .

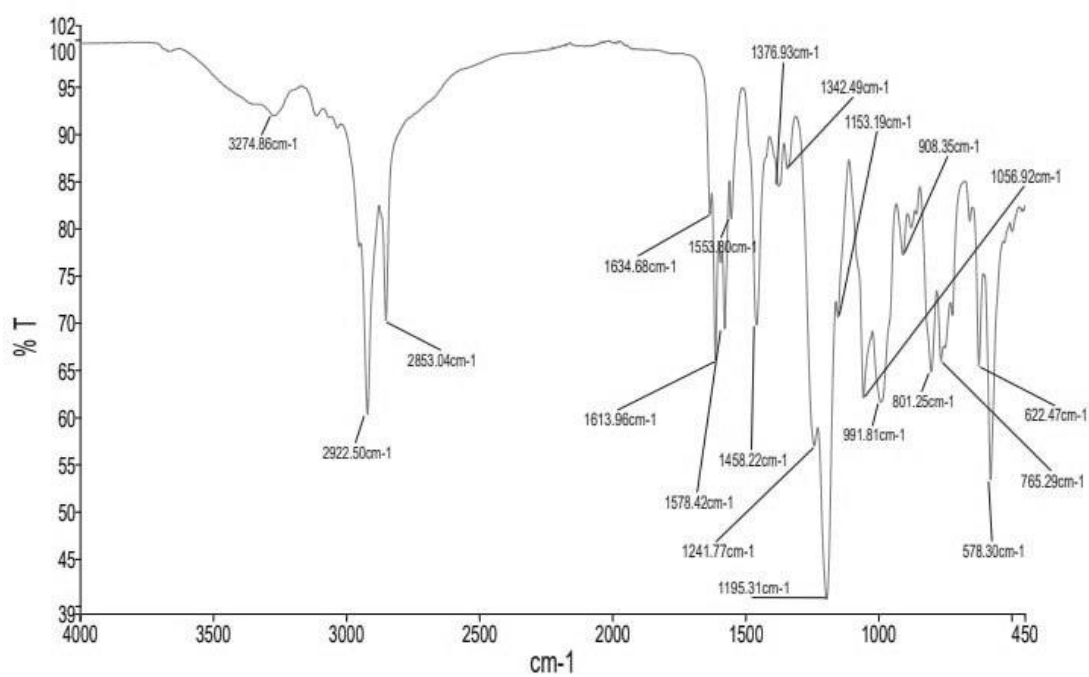

Figure S6. FTIR-ATR spectrum of  $[\text{HCQH}_2][\text{C}_{12}\text{SO}_4]_2$ .

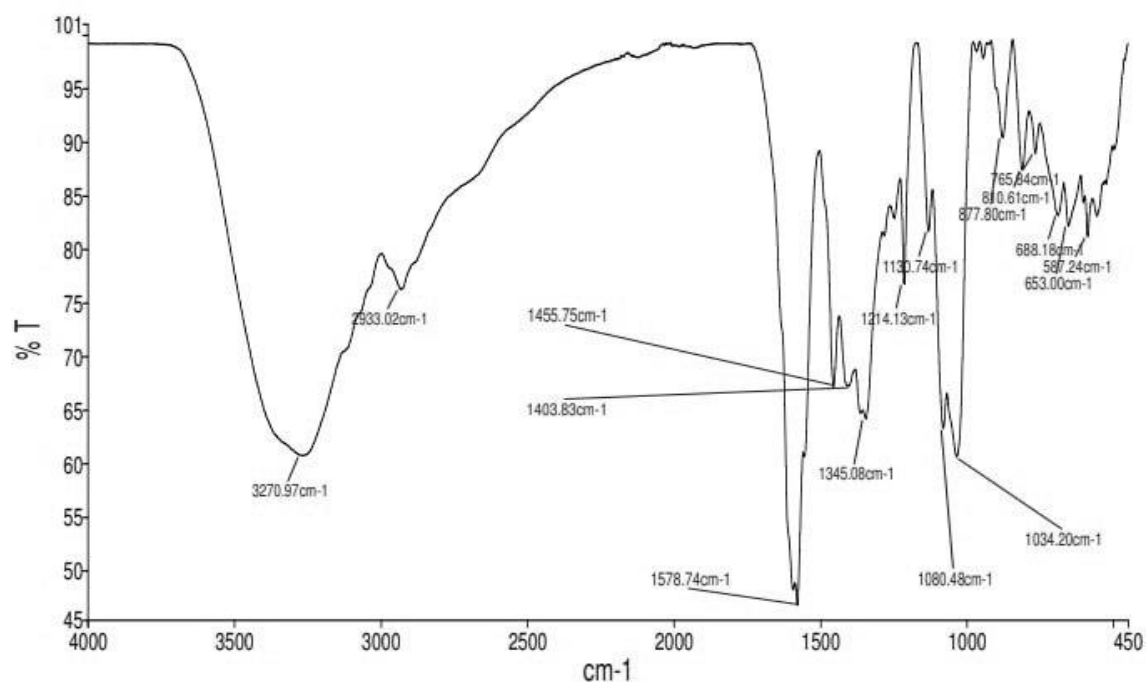

Figure S7. FTIR-ATR spectrum of [HCQH<sub>2</sub>][GlcCOO]<sub>2</sub>.

# NMR spectra

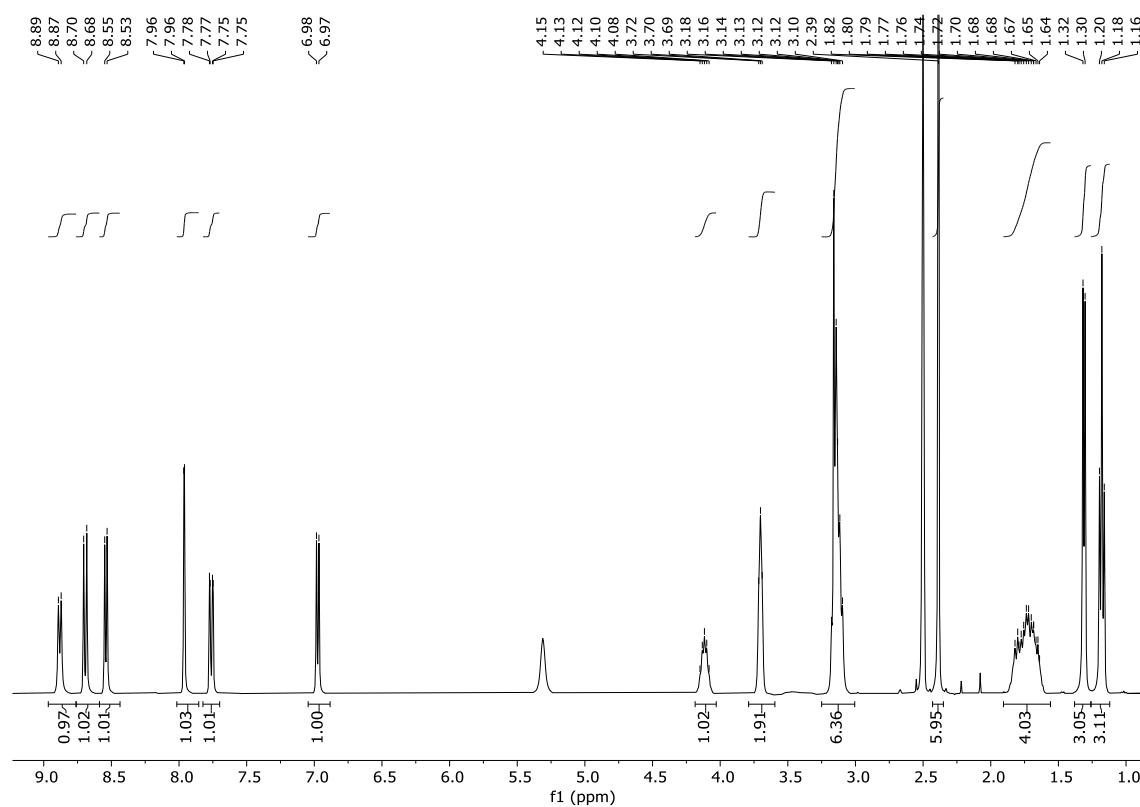

Figure S8. <sup>1</sup>H NMR spectrum of [HCQH<sub>2</sub>][C<sub>1</sub>SO<sub>3</sub>]<sub>2</sub> in DMSO-*d*<sub>6</sub>.

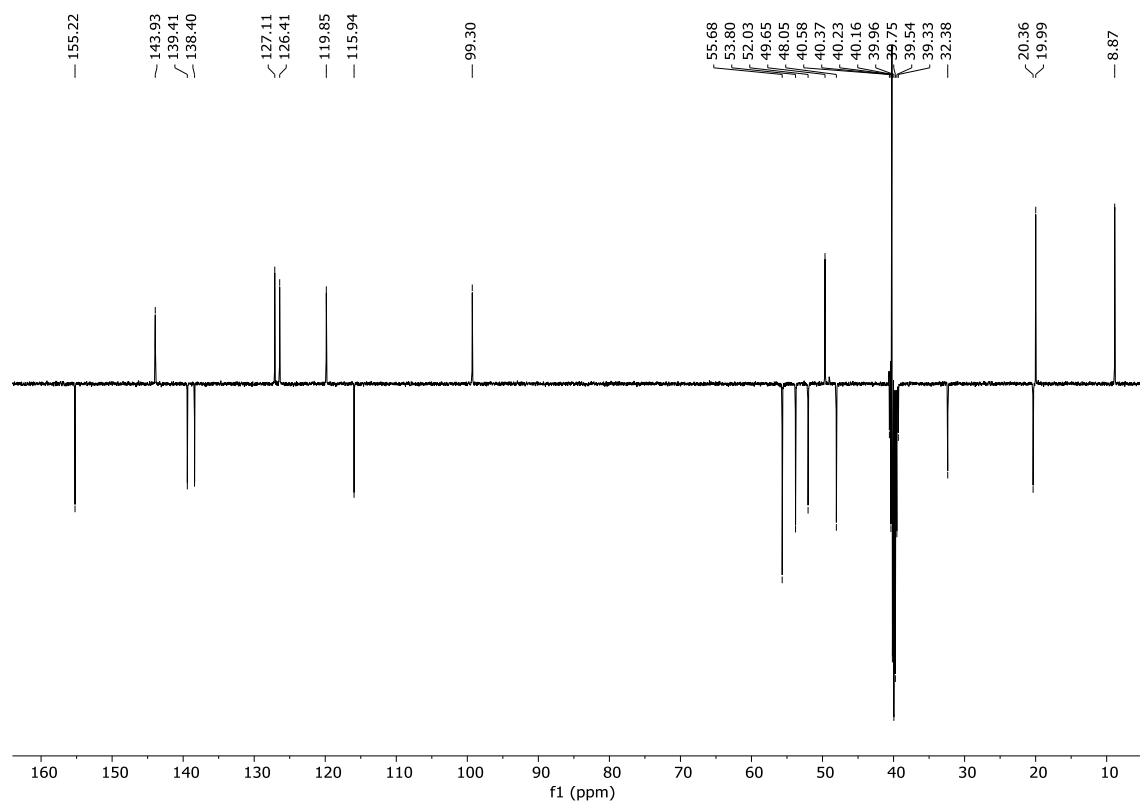

Figure S9. <sup>13</sup>C APT NMR spectrum of [HCQH<sub>2</sub>][C<sub>1</sub>SO<sub>3</sub>]<sub>2</sub> in DMSO-*d*<sub>6</sub>.

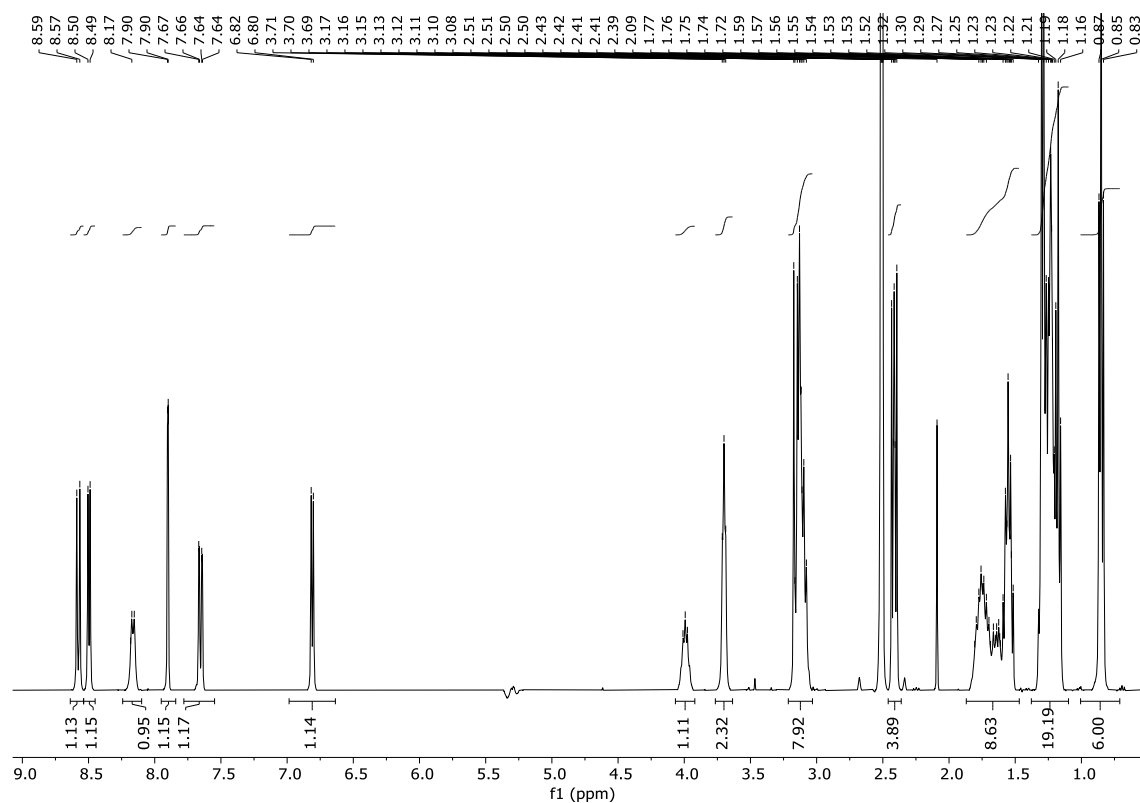

Figure S10. <sup>1</sup>H NMR spectrum of [HCQH<sub>2</sub>][C<sub>6</sub>SO<sub>3</sub>]<sub>2</sub> in DMSO-*d*<sub>6</sub>.

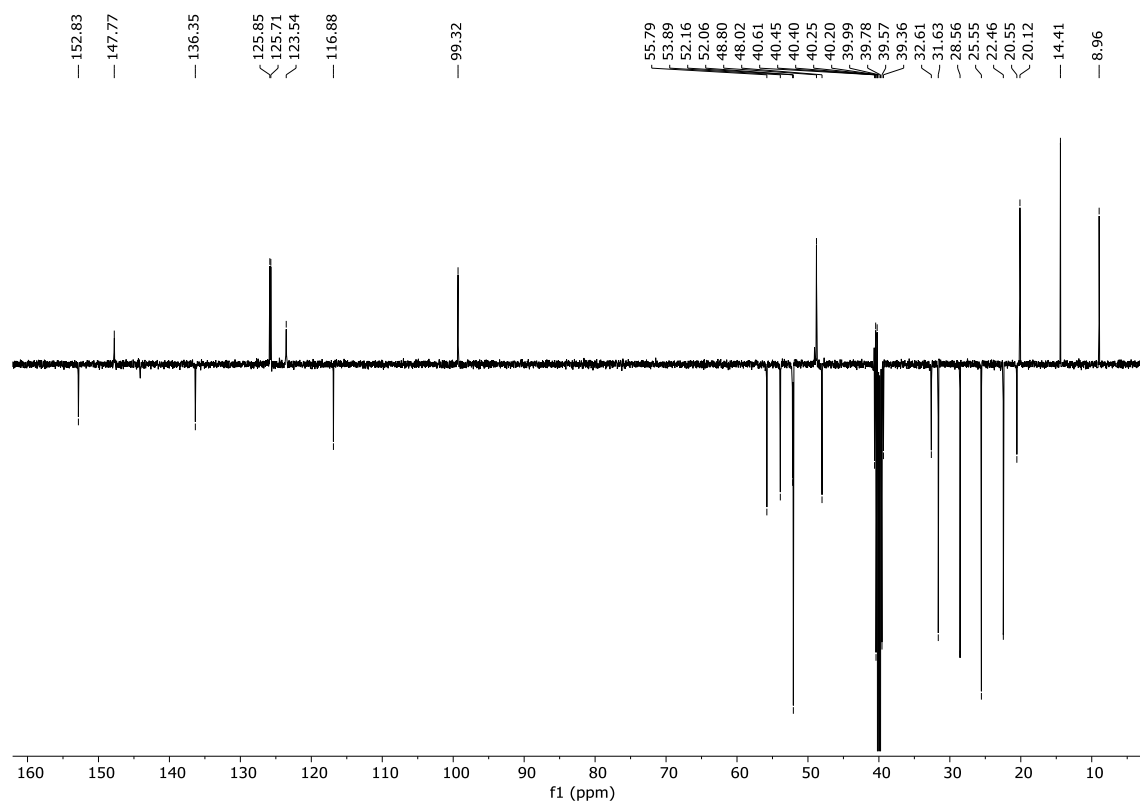

Figure S11. <sup>13</sup>C APT NMR spectrum of [HCQH<sub>2</sub>][C<sub>6</sub>SO<sub>3</sub>]<sub>2</sub> in DMSO-*d*<sub>6</sub>.

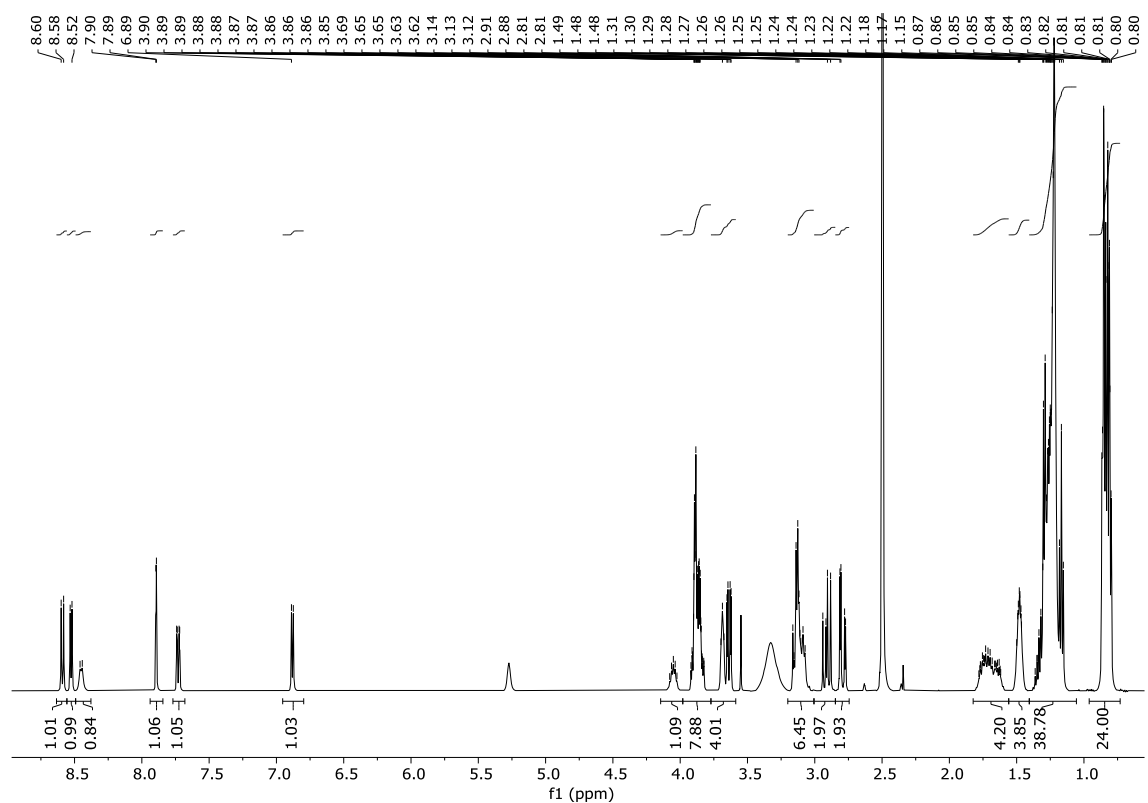

Figure S12. <sup>1</sup>H NMR spectrum of [HCQH<sub>2</sub>][DocSO<sub>3</sub>]<sub>2</sub> in DMSO-*d*<sub>6</sub>.

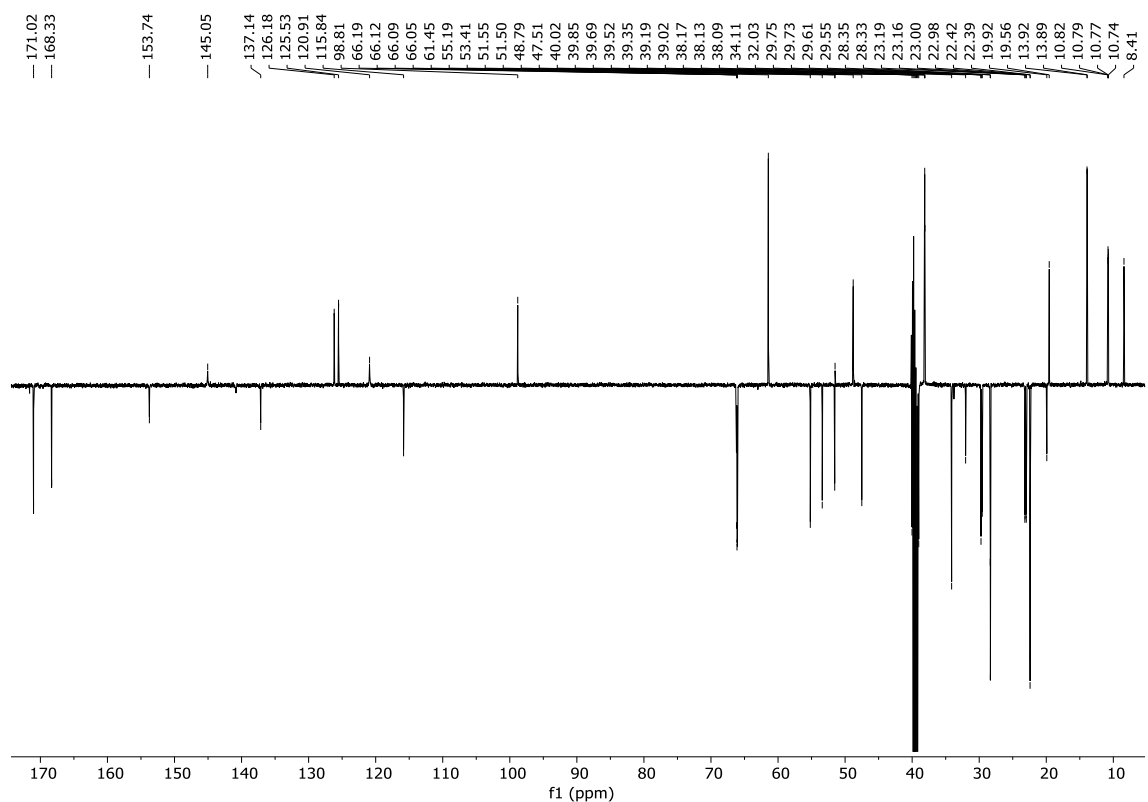

Figure S13. <sup>13</sup>C APT NMR spectrum of [HCQH<sub>2</sub>][DocSO<sub>3</sub>]<sub>2</sub> in DMSO-*d*<sub>6</sub>.

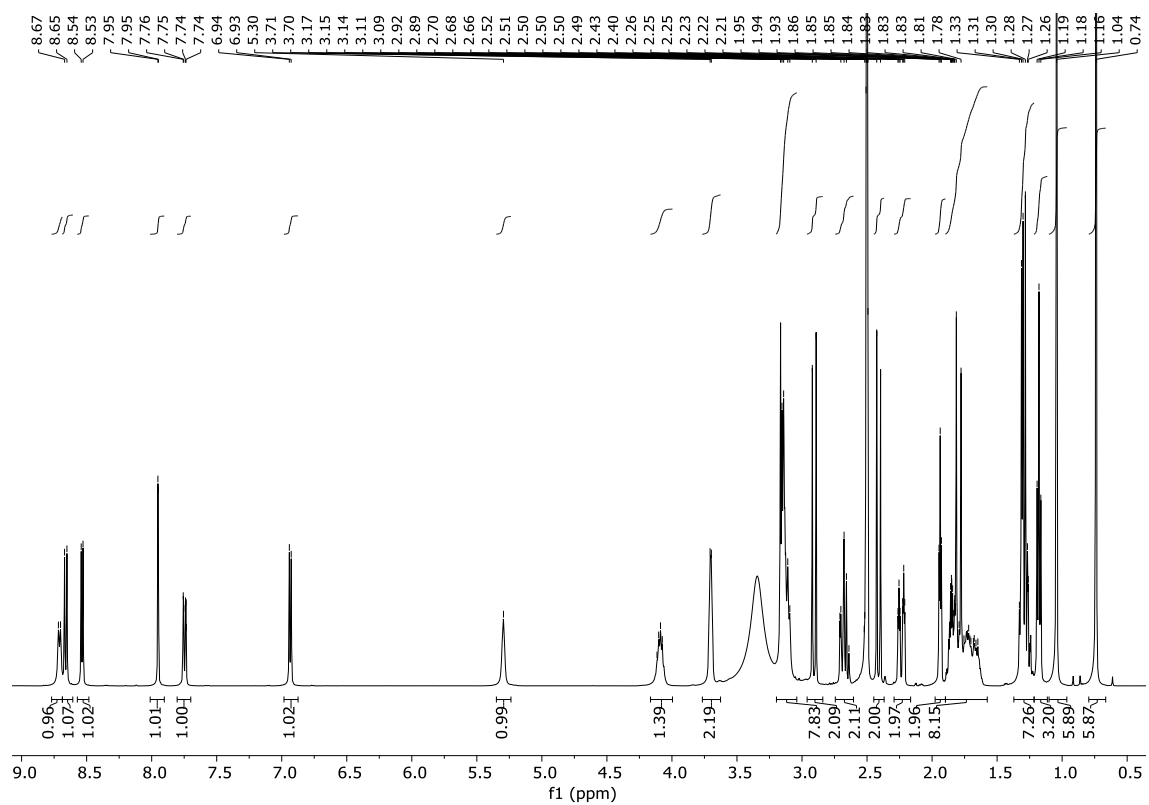

Figure S14. <sup>1</sup>H NMR spectrum of [HCQH<sub>2</sub>][CampSO<sub>3</sub>]<sub>2</sub> in DMSO-*d*<sub>6</sub>.

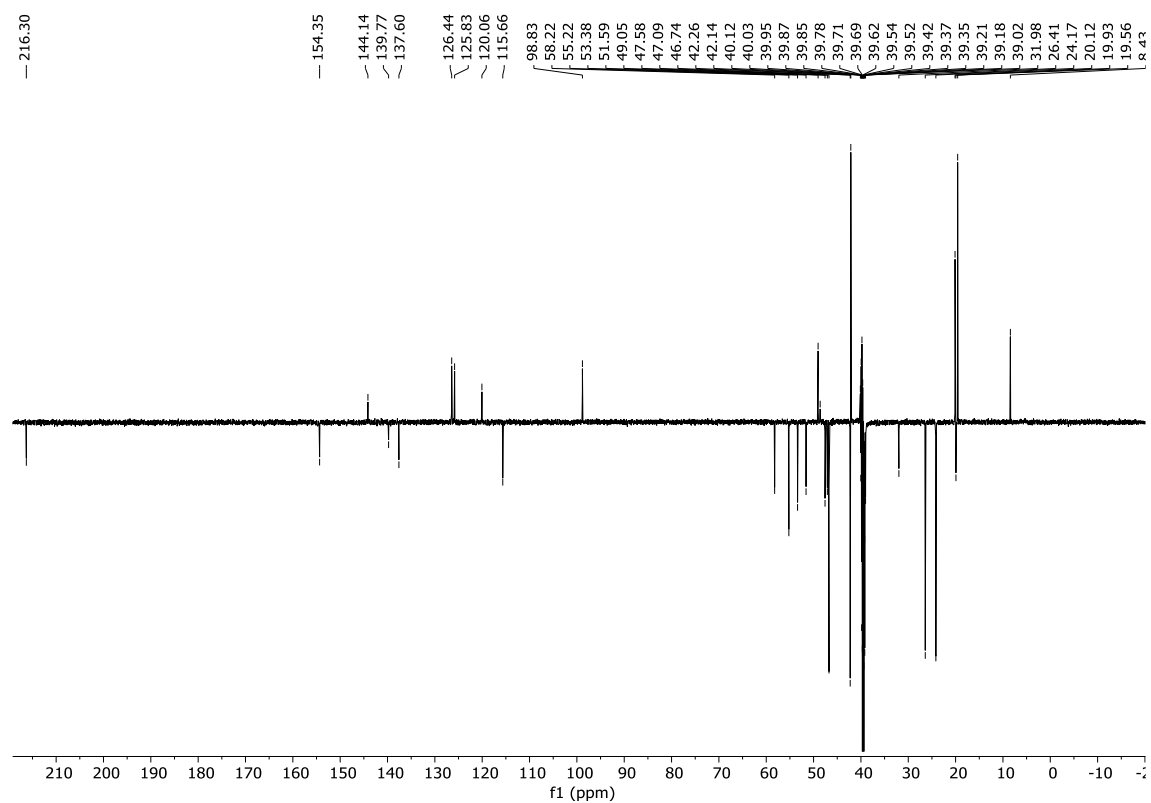

Figure S15. <sup>13</sup>C APT NMR spectrum of [HCQH<sub>2</sub>][CampSO<sub>3</sub>]<sub>2</sub> in DMSO-*d*<sub>6</sub>.



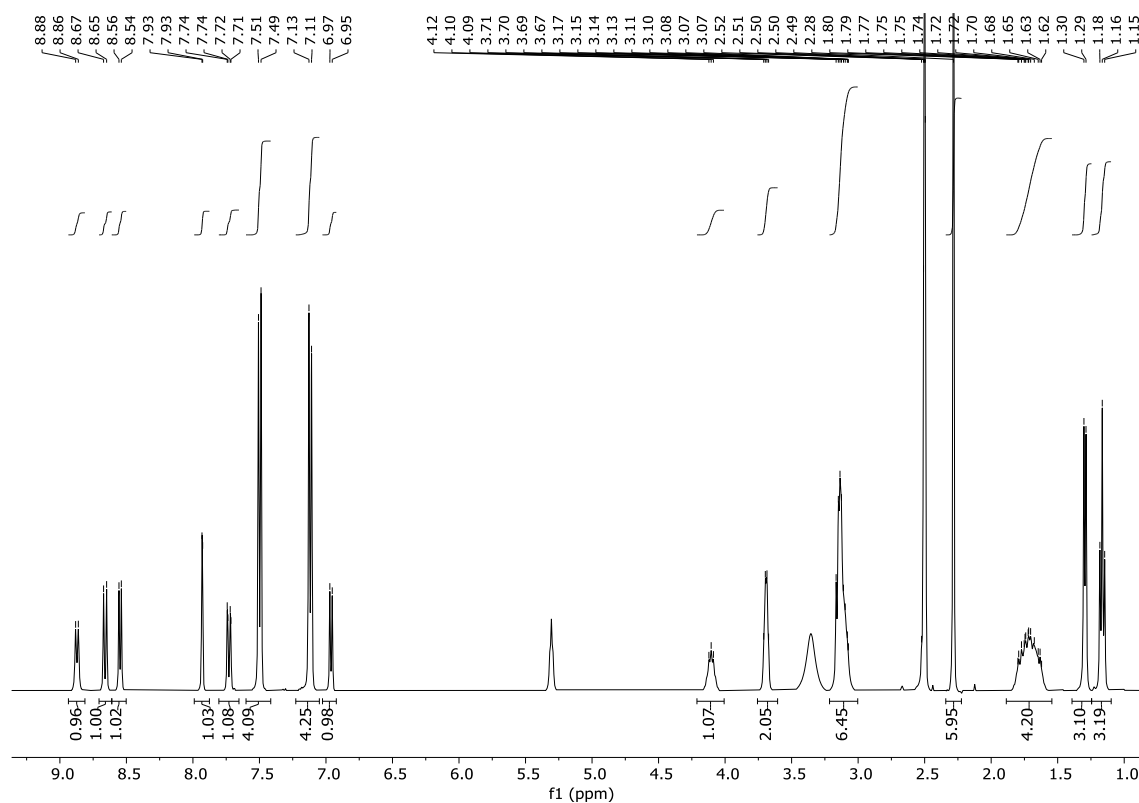

Figure S16. <sup>1</sup>H NMR spectrum of [HCQH<sub>2</sub>][*p*-TolSO<sub>3</sub>]<sub>2</sub> in DMSO-*d*<sub>6</sub>.

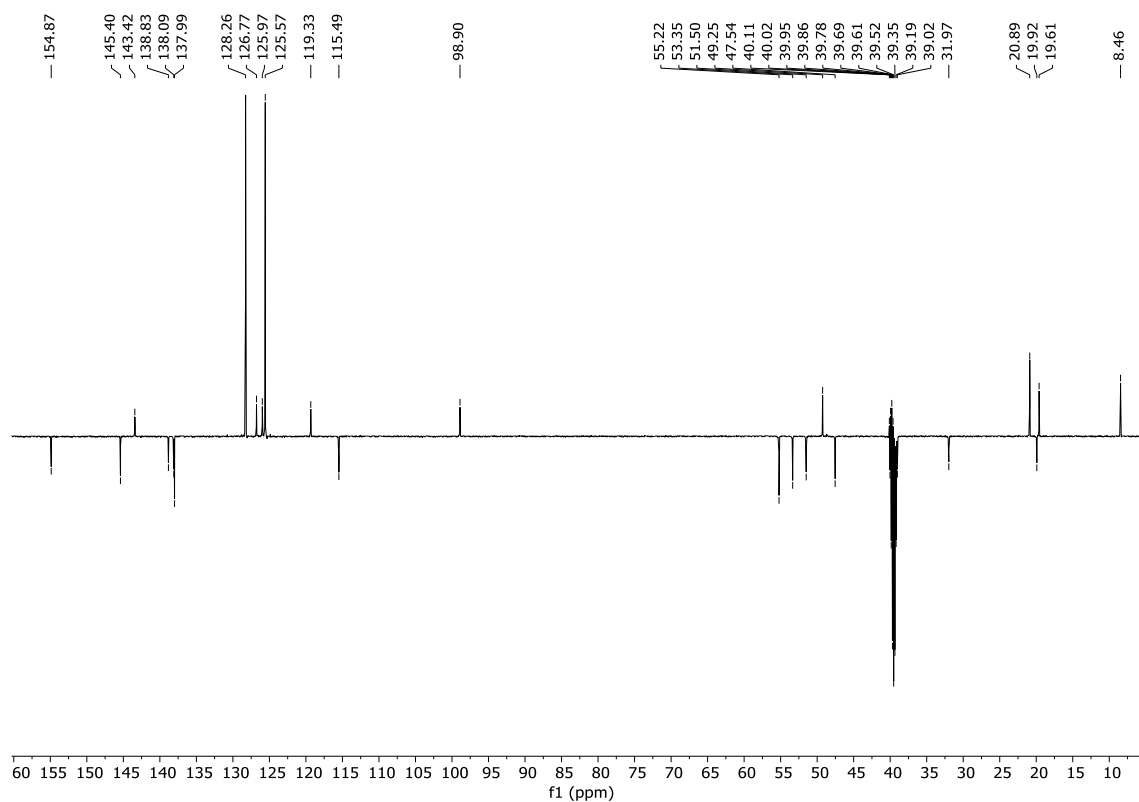

Figure S17. <sup>13</sup>C APT NMR spectrum of [HCQH<sub>2</sub>][*p*-TolSO<sub>3</sub>]<sub>2</sub> in DMSO-*d*<sub>6</sub>.

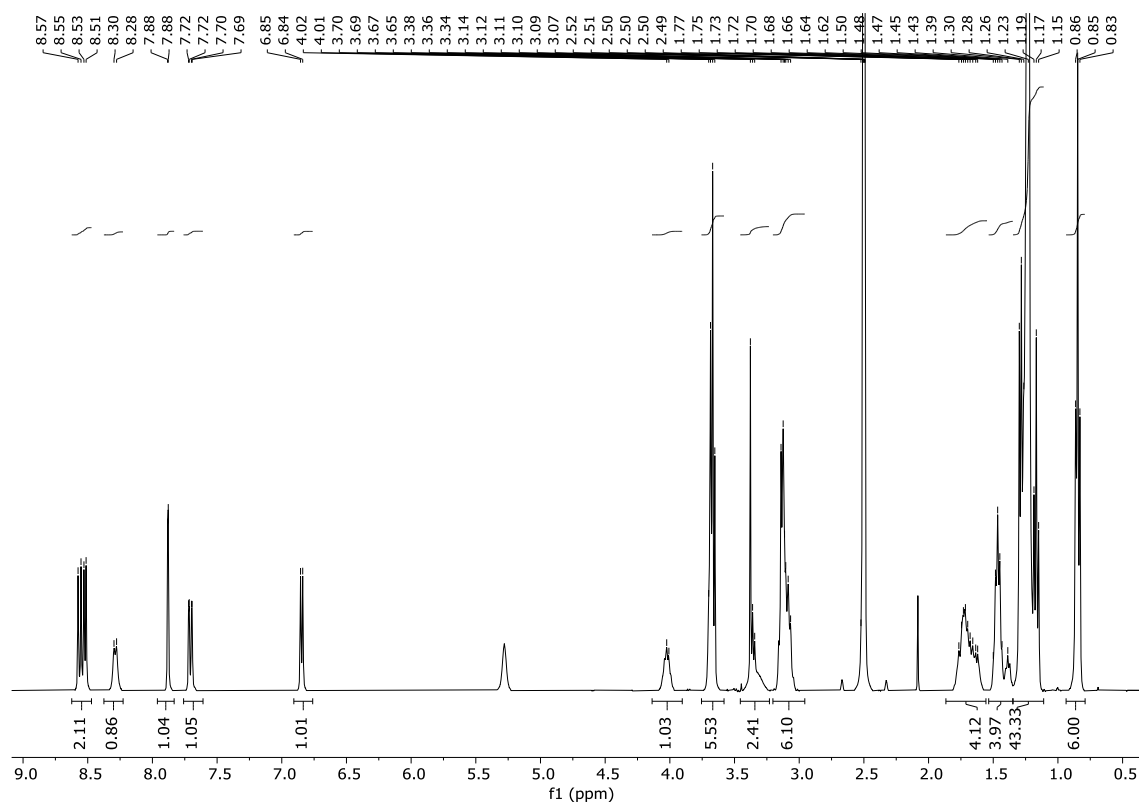

Figure S18. <sup>1</sup>H NMR spectrum of [HCQH<sub>2</sub>][C<sub>12</sub>SO<sub>4</sub>]<sub>2</sub> in DMSO-*d*<sub>6</sub>.

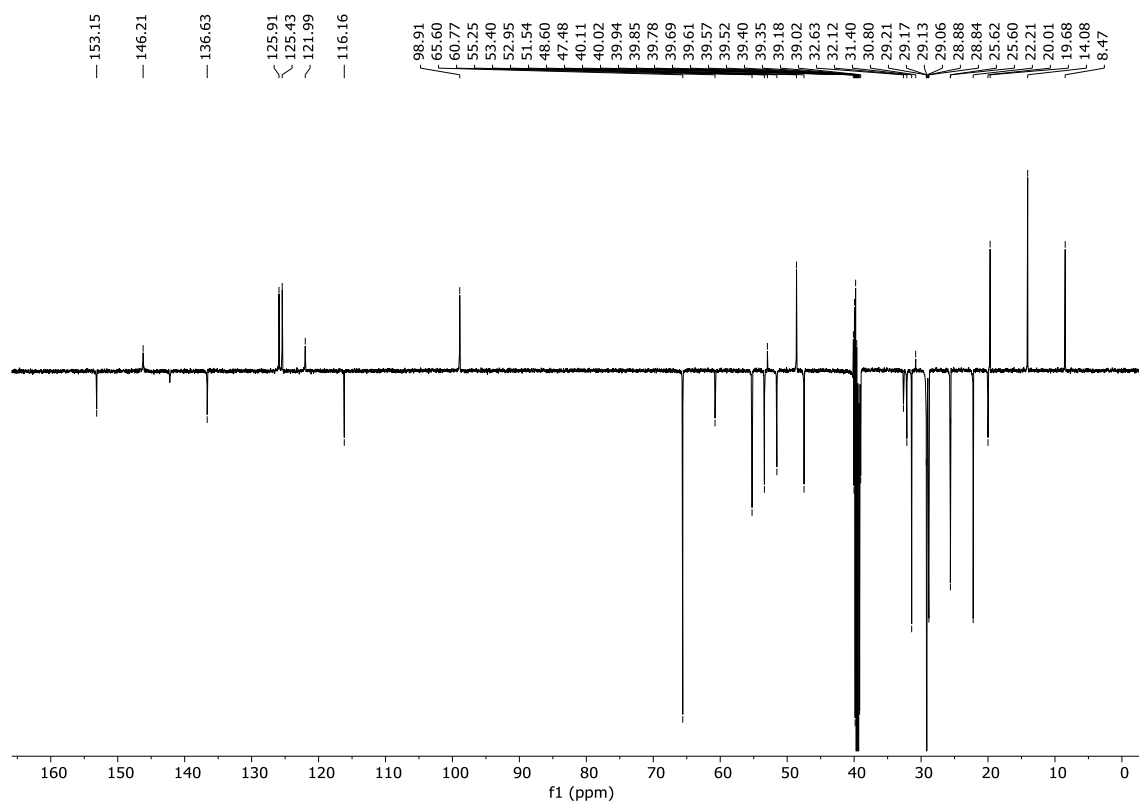

Figure S19. <sup>13</sup>C APT NMR spectrum of [HCQH<sub>2</sub>][C<sub>12</sub>SO<sub>4</sub>]<sub>2</sub> in DMSO-*d*<sub>6</sub>.

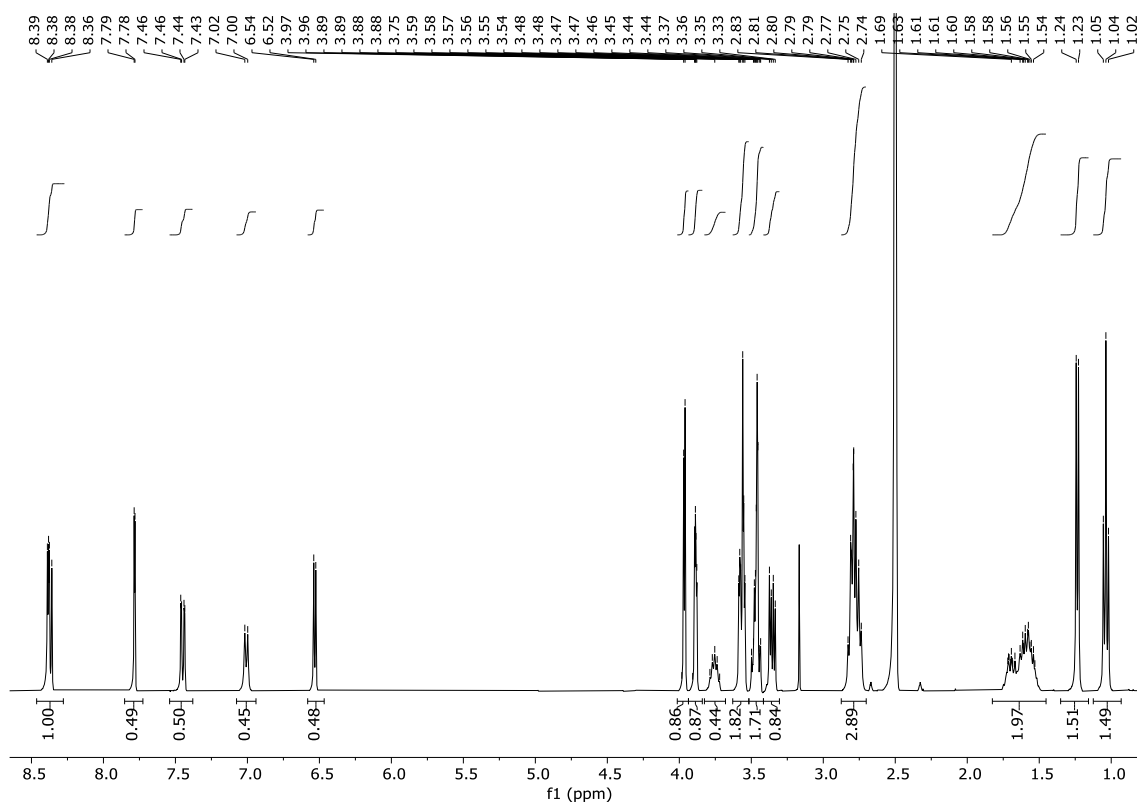

Figure S20. <sup>1</sup>H NMR spectrum of [HCQH<sub>2</sub>][GlcCOO]<sub>2</sub> in DMSO-*d*<sub>6</sub>.

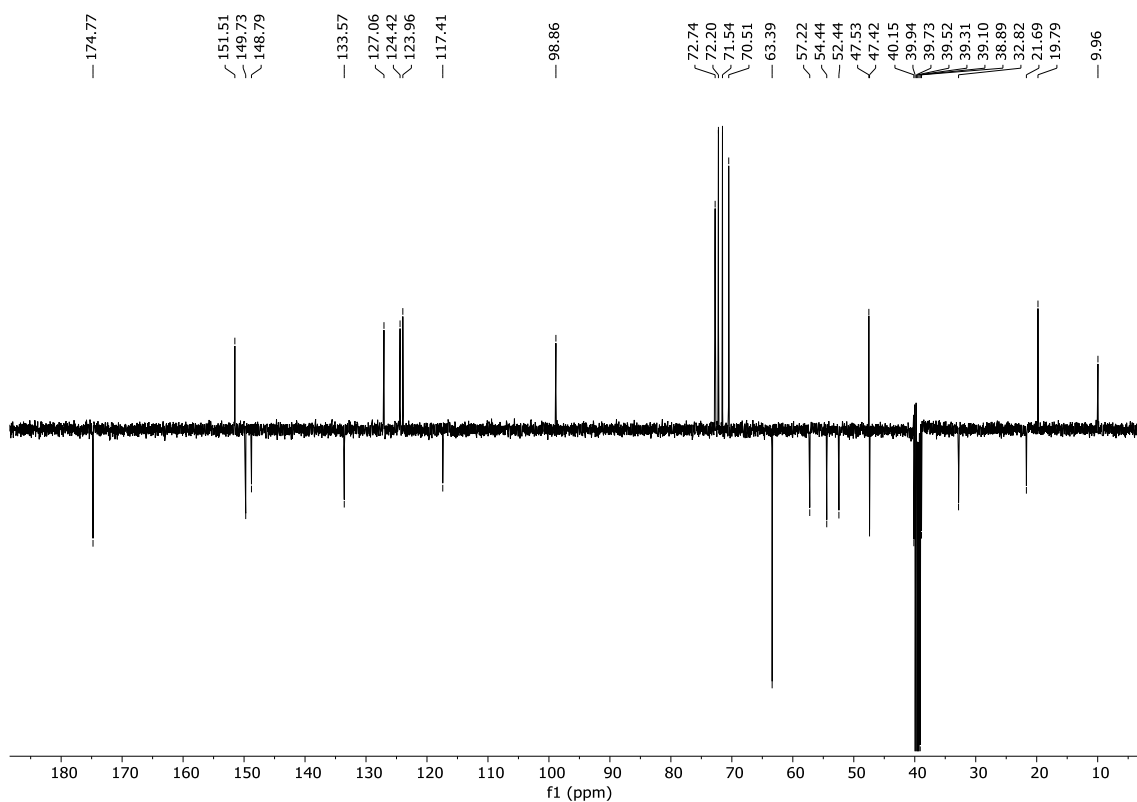

Figure S21. <sup>13</sup>C APT NMR spectrum of [HCQH<sub>2</sub>][GlcCOO]<sub>2</sub> in DMSO-*d*<sub>6</sub>.

*HRMS spectra*

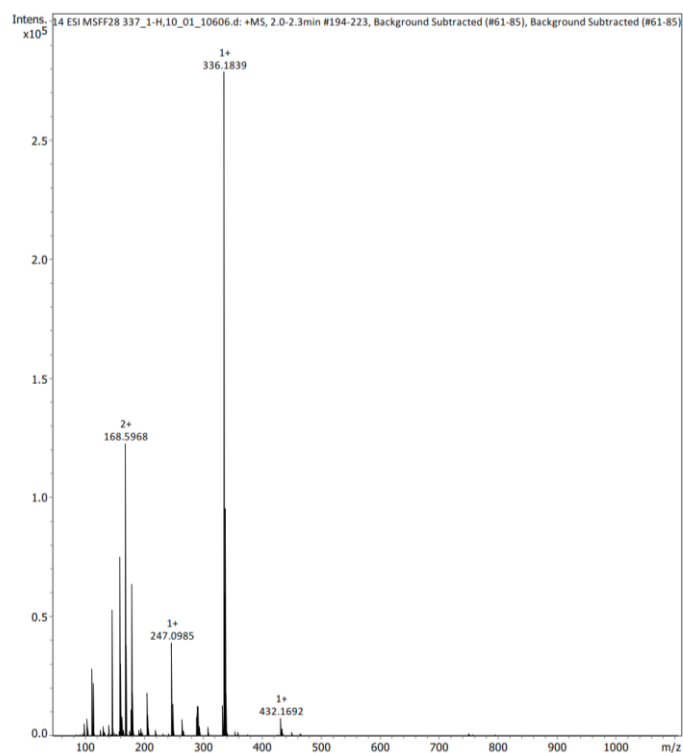

Figure S22. ESI-TOF mass spectra in positive mode of  $[\text{HCQH}_2][\text{C}_1\text{SO}_3]_2$ .

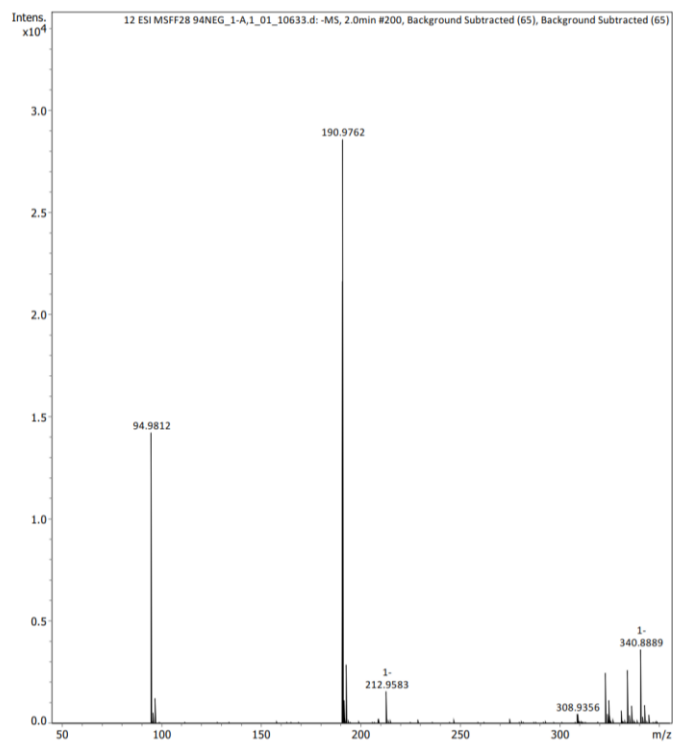

Figure S23. ESI-TOF mass spectra in negative mode of  $[\text{HCQH}_2][\text{C}_1\text{SO}_3]_2$ .

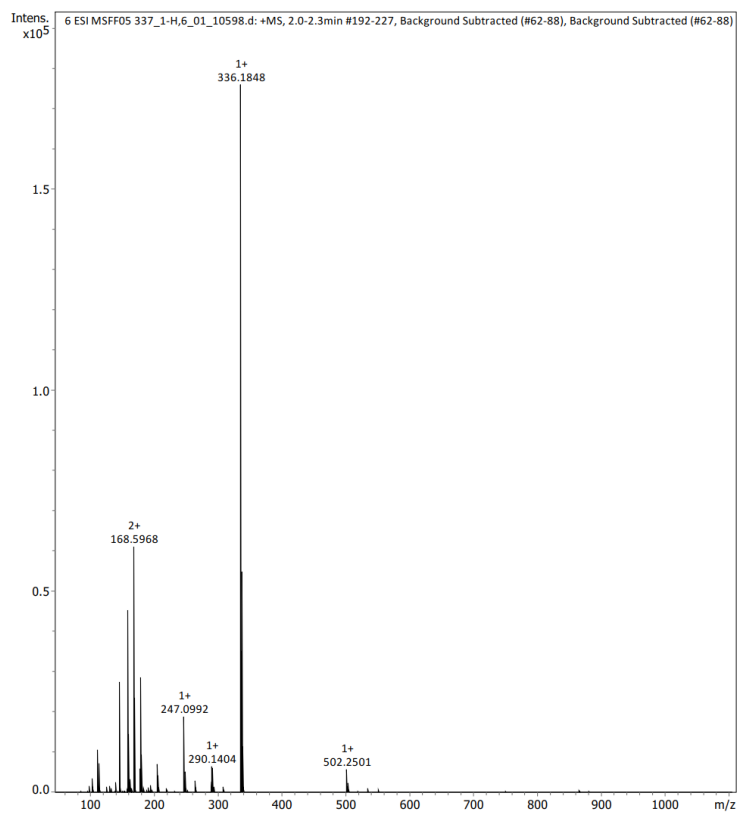

Figure S24. ESI-TOF mass spectra in positive mode of  $[\text{HCQH}_2][\text{C}_6\text{SO}_3]_2$ .

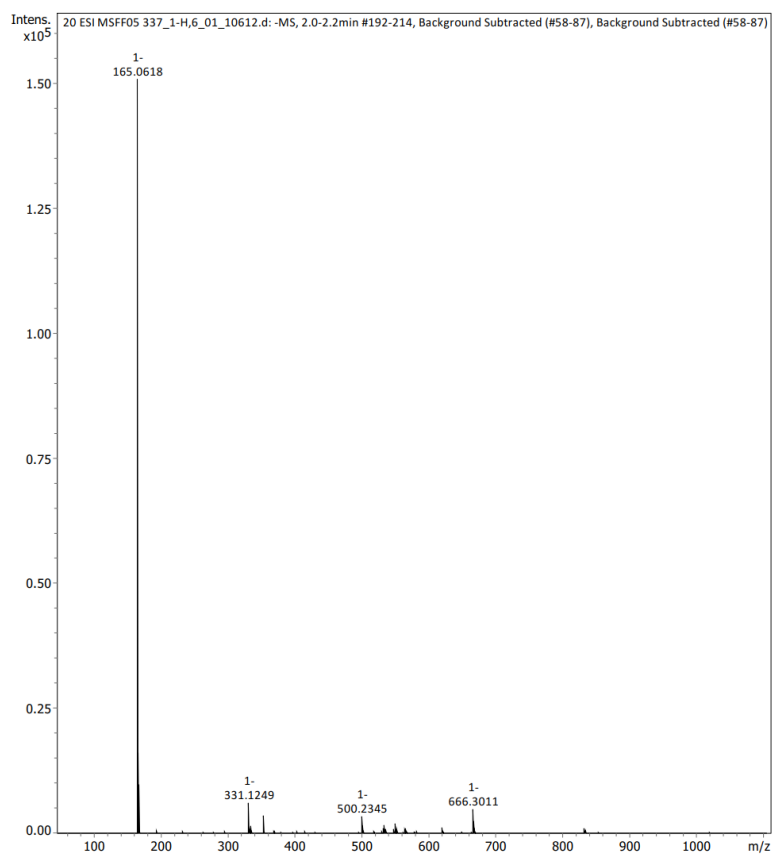

Figure S25. ESI-TOF mass spectra in negative mode of  $[\text{HCQH}_2][\text{C}_6\text{SO}_3]_2$ .

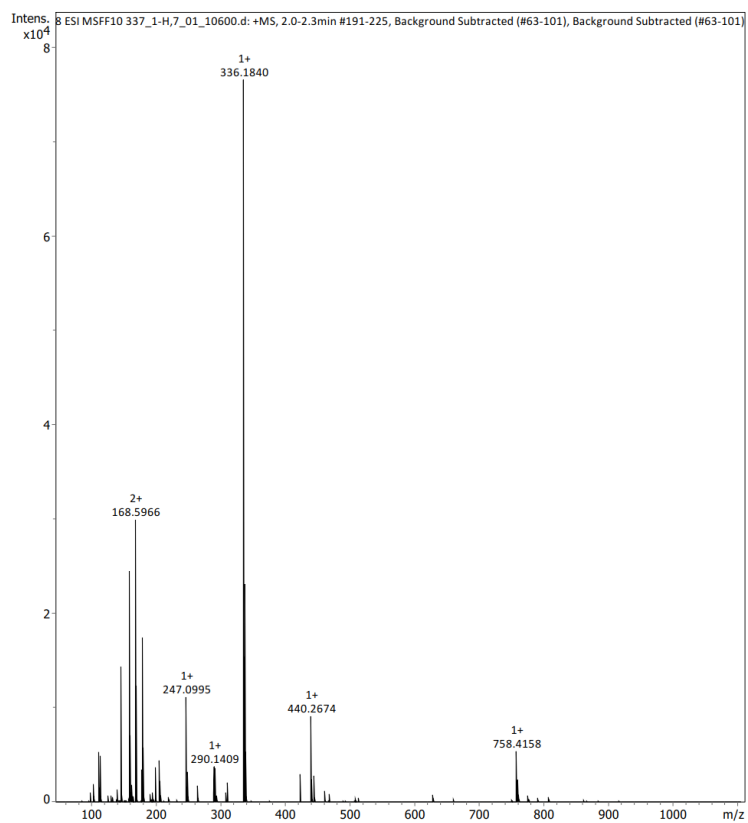

Figure S26. ESI-TOF mass spectra in positive mode of  $[\text{HCQH}_2][\text{DocSO}_3]_2$ .

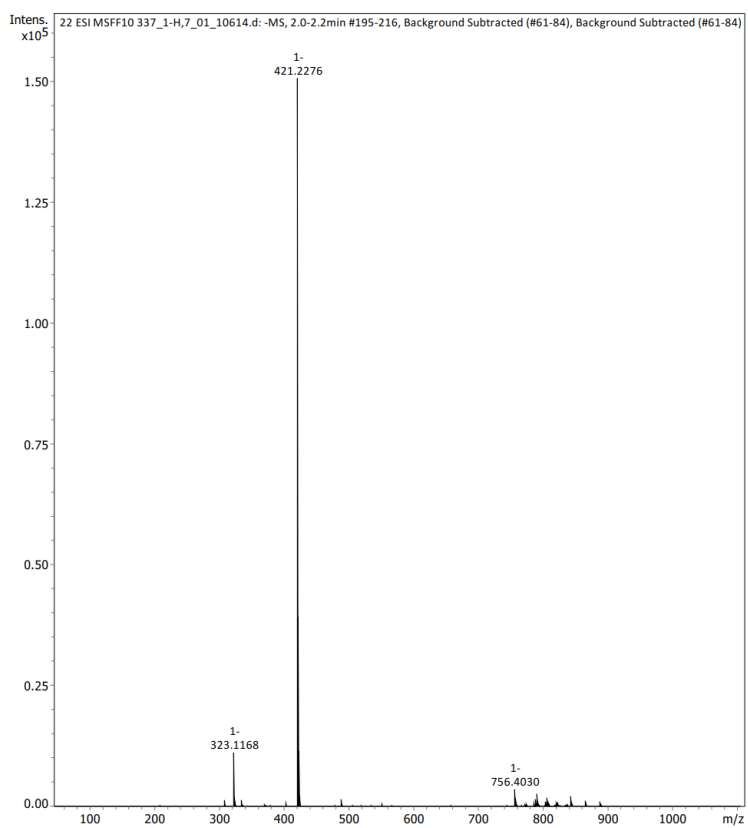

Figure S27. ESI-TOF mass spectra in negative mode of  $[\text{HCQH}_2][\text{DocSO}_3]_2$ .

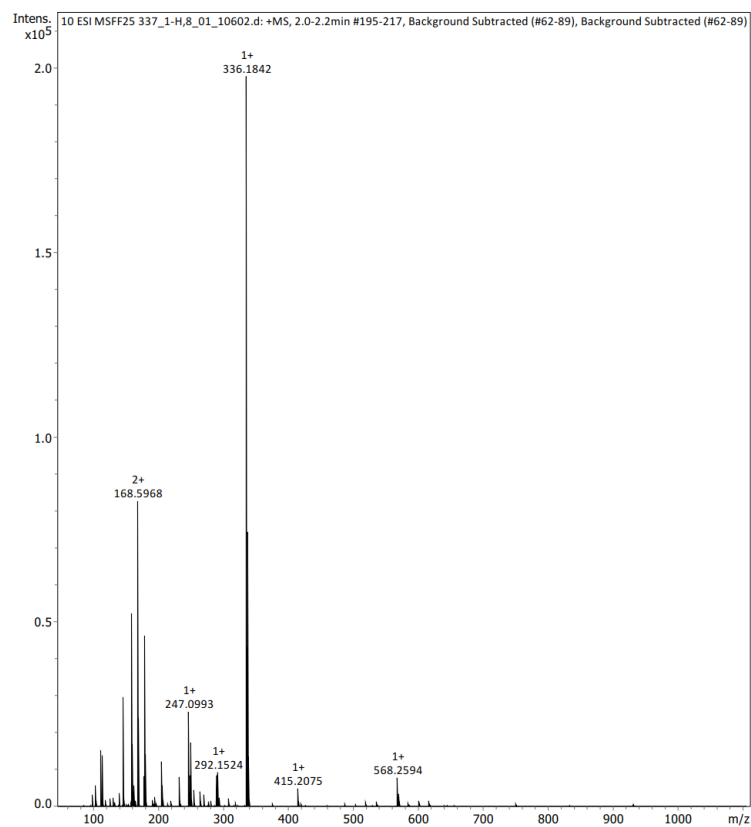

Figure S28. ESI-TOF mass spectra in positive mode of [HCQH<sub>2</sub>][CampSO<sub>3</sub>]<sub>2</sub>.

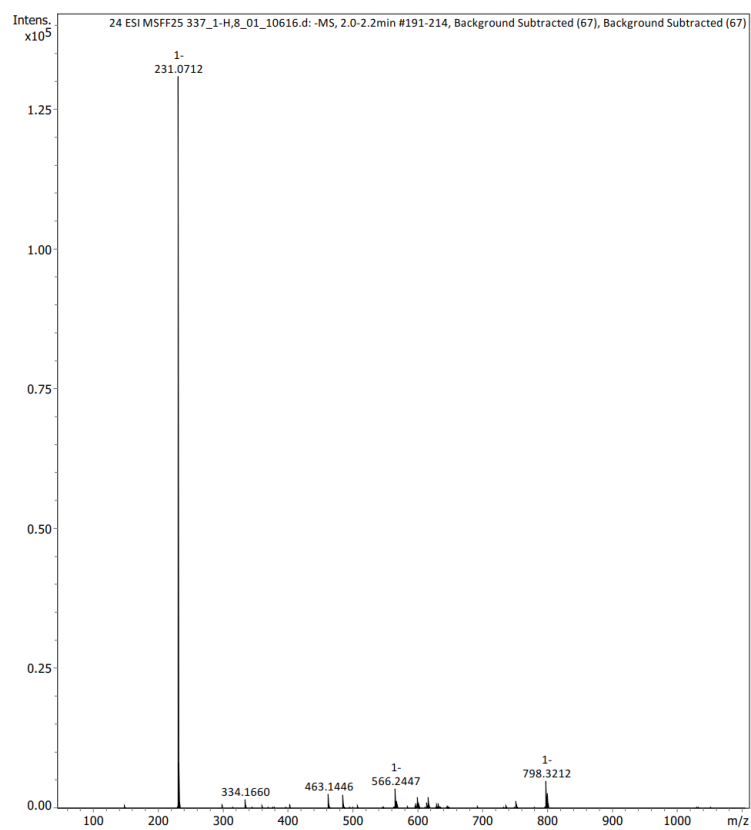

Figure S29. ESI-TOF mass spectra in negative mode of [HCQH<sub>2</sub>][CampSO<sub>3</sub>]<sub>2</sub>.

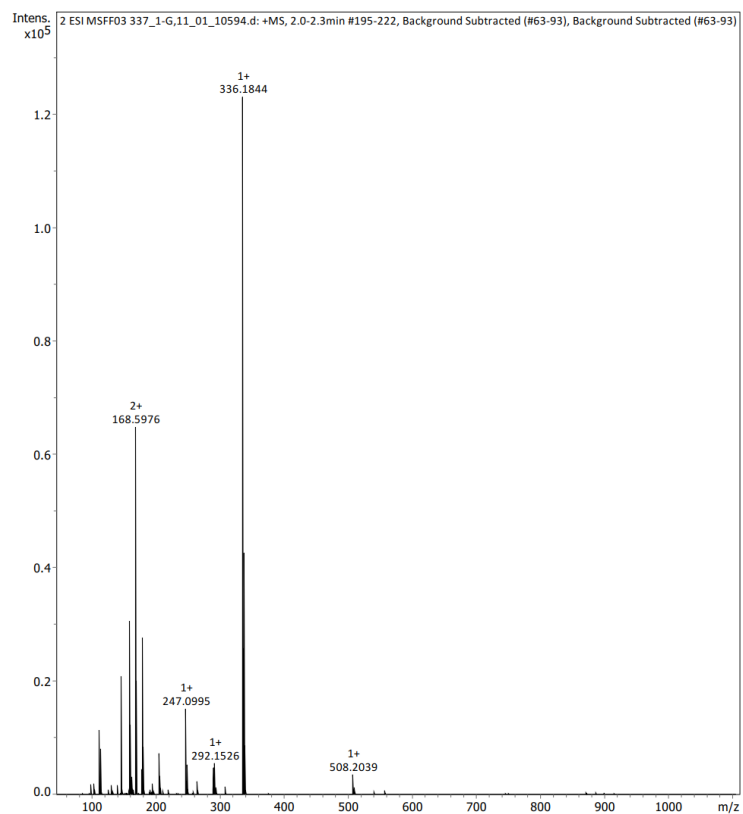

Figure S30. ESI-TOF mass spectra in positive mode of  $[\text{HCQH}_2][p\text{-TolSO}_3]_2$ .

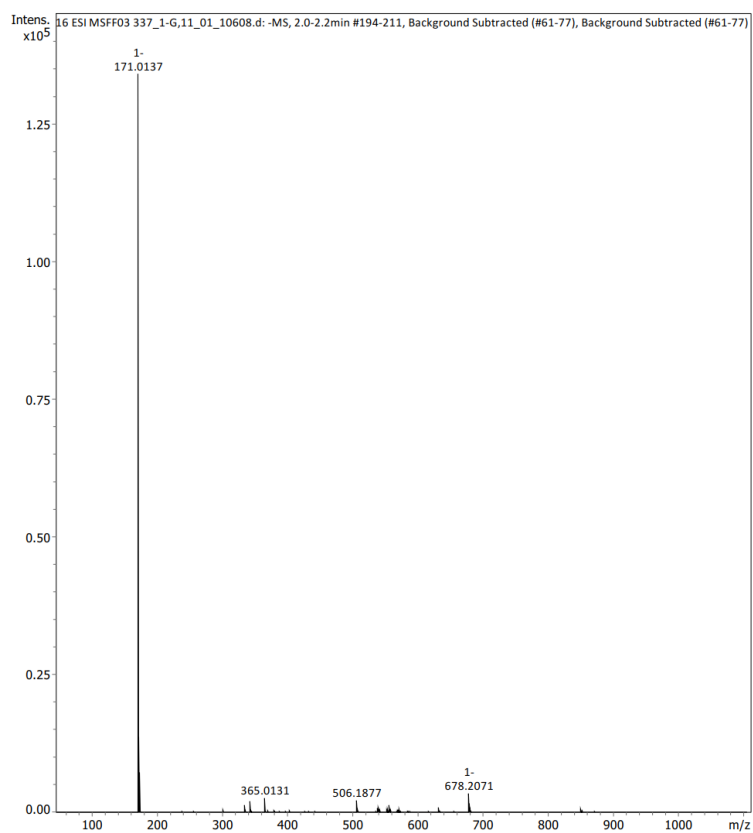

Figure S31. ESI-TOF mass spectra in negative mode of  $[\text{HCQH}_2][p\text{-TolSO}_3]_2$ .



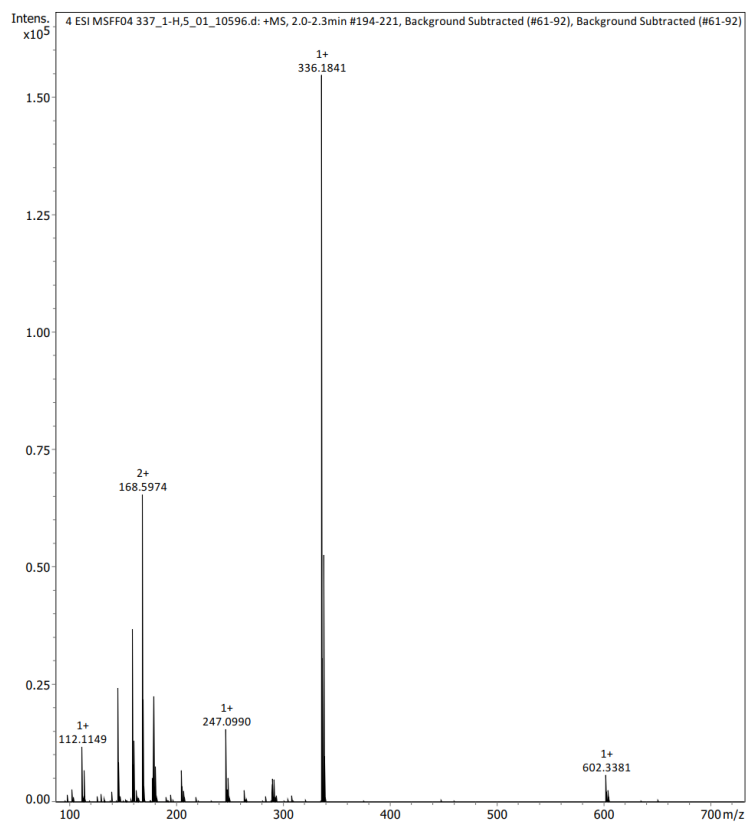

Figure S32. ESI-TOF mass spectra in positive mode of  $[\text{HCQH}_2][\text{C}_{12}\text{SO}_4]_2$ .

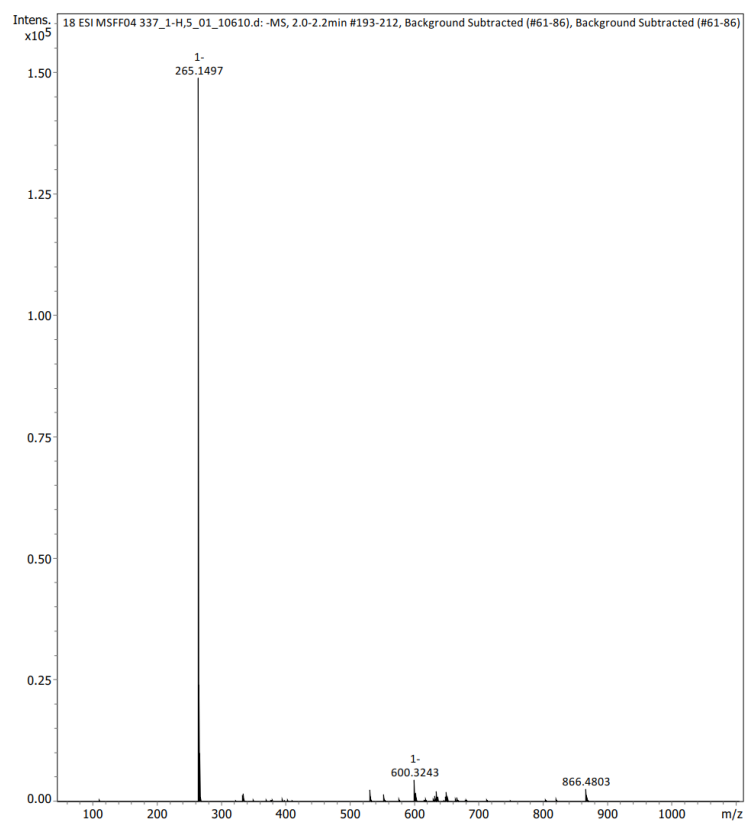

Figure S33. ESI-TOF mass spectra in negative mode of  $[\text{HCQH}_2][\text{C}_{12}\text{SO}_4]_2$ .

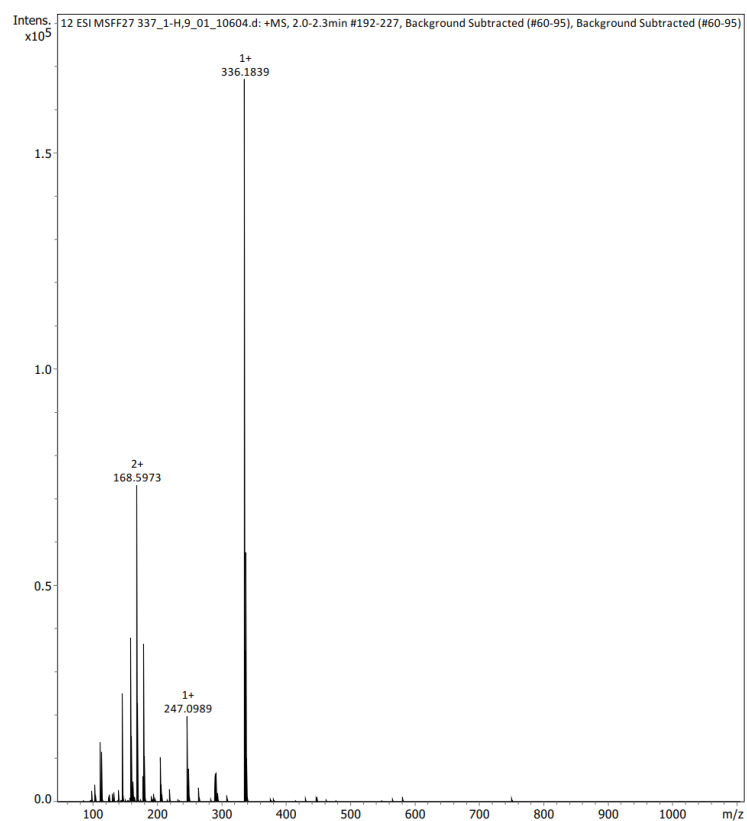

Figure S34. ESI-TOF mass spectra in positive mode of  $[\text{HCQH}_2][\text{GlcCOO}]_2$ .

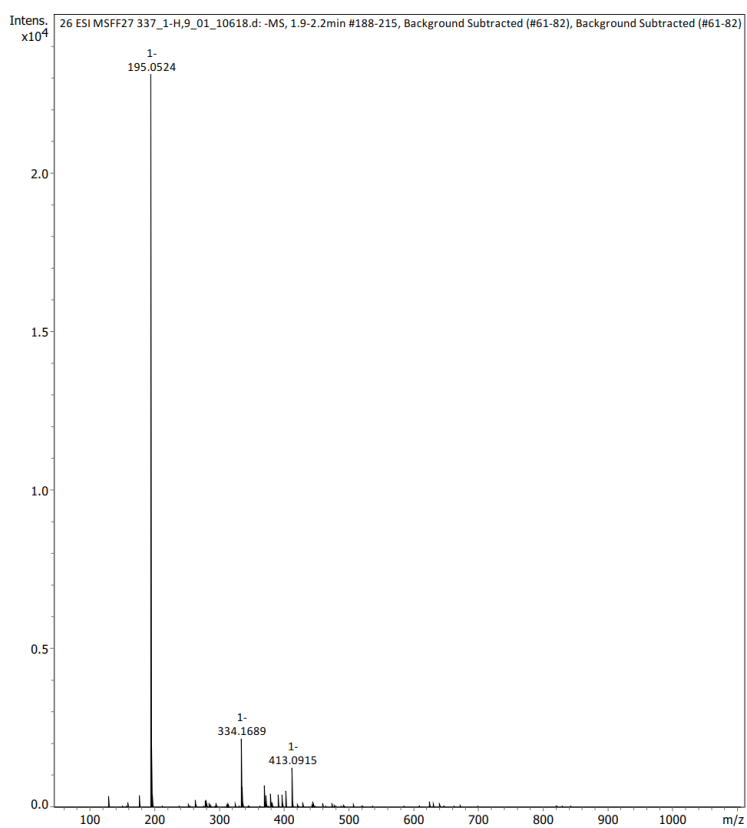

Figure S35. ESI-TOF mass spectra in negative mode of  $[\text{HCQH}_2][\text{GlcCOO}]_2$ .

Table S1. Experimental and calculated  $m/z$  values and corresponding errors (ppm) for the  $[M+1]^+$  and  $[M+2]^{2+}$  ions in positive mode of ESI-TOF for each HCQ-IL.

|                                                                     | Exp. $m/z$<br>[M+1] <sup>+</sup> | Calc. $m/z$<br>[M+1] <sup>+</sup> | error<br>/ppm | Exp. $m/z$<br>[M+2] <sup>2+</sup> | Calc. $m/z$<br>[M+2] <sup>2+</sup> | error<br>/ppm |
|---------------------------------------------------------------------|----------------------------------|-----------------------------------|---------------|-----------------------------------|------------------------------------|---------------|
| [HCQH <sub>2</sub> ][C <sub>1</sub> SO <sub>3</sub> ] <sub>2</sub>  | 336.1839                         | 336.1837                          | -0.59         | 168.5968                          | 168.5955                           | -7.71         |
| [HCQH <sub>2</sub> ][C <sub>6</sub> SO <sub>3</sub> ] <sub>2</sub>  | 336.1848                         | 336.1837                          | -3.27         | 168.5968                          | 168.5955                           | -7.71         |
| [HCQH <sub>2</sub> ][DocSO <sub>3</sub> ] <sub>2</sub>              | 336.1840                         | 336.1837                          | -0.89         | 168.5966                          | 168.5955                           | -6.52         |
| [HCQH <sub>2</sub> ][CampSO <sub>3</sub> ] <sub>2</sub>             | 336.1842                         | 336.1837                          | -1.49         | 168.5968                          | 168.5955                           | -7.71         |
| [HCQH <sub>2</sub> ][ <i>p</i> -TolSO <sub>3</sub> ] <sub>2</sub>   | 336.1844                         | 336.1837                          | -2.08         | 168.5976                          | 168.5955                           | -12.46        |
| [HCQH <sub>2</sub> ][C <sub>12</sub> SO <sub>4</sub> ] <sub>2</sub> | 336.1841                         | 336.1837                          | -1.19         | 168.5974                          | 168.5955                           | -11.27        |
| [HCQH <sub>2</sub> ][GlcCOO] <sub>2</sub>                           | 336.1839                         | 336.1837                          | -0.59         | 168.5973                          | 168.5955                           | -10.68        |

Table S2. Experimental and calculated  $m/z$  values and corresponding errors (ppm) for the  $[M-1]^-$  ion in negative mode of ESI-TOF for each HCQ-IL.

|                                                                     | Exp. $m/z$ [M-1] <sup>-</sup> | Calc. $m/z$ [M-1] <sup>-</sup> | error /ppm |
|---------------------------------------------------------------------|-------------------------------|--------------------------------|------------|
| [HCQH <sub>2</sub> ][C <sub>1</sub> SO <sub>3</sub> ] <sub>2</sub>  | 94.9808                       | 94.9812                        | 4.21       |
| [HCQH <sub>2</sub> ][C <sub>6</sub> SO <sub>3</sub> ] <sub>2</sub>  | 165.0618                      | 165.0590                       | -16.96     |
| [HCQH <sub>2</sub> ][DocSO <sub>3</sub> ] <sub>2</sub>              | 421.2276                      | 421.2265                       | -2.61      |
| [HCQH <sub>2</sub> ][CampSO <sub>3</sub> ] <sub>2</sub>             | 231.0696                      | 231.0712                       | 6.92       |
| [HCQH <sub>2</sub> ][ <i>p</i> -TolSO <sub>3</sub> ] <sub>2</sub>   | 171.0137                      | 171.0121                       | -9.36      |
| [HCQH <sub>2</sub> ][C <sub>12</sub> SO <sub>4</sub> ] <sub>2</sub> | 265.1497                      | 265.1479                       | -6.79      |
| [HCQH <sub>2</sub> ][GlcCOO] <sub>2</sub>                           | 195.0510                      | 195.0524                       | 7.18       |

DSC thermograms

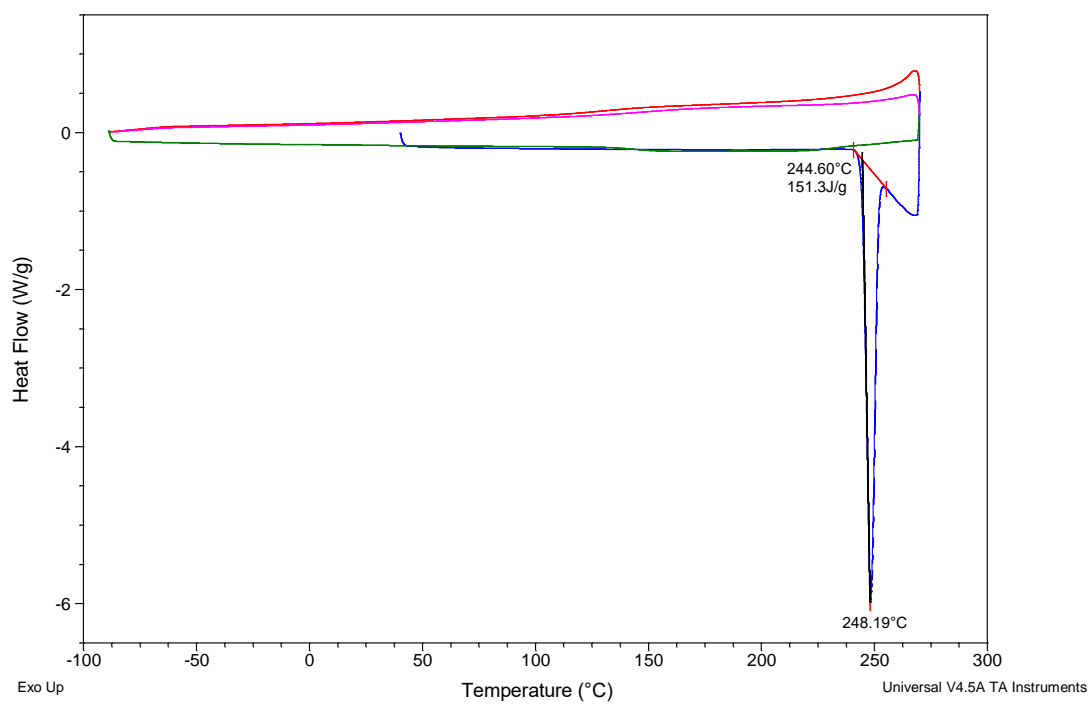

Figure S36. DSC thermogram of [HCQH<sub>2</sub>][SO<sub>4</sub>].

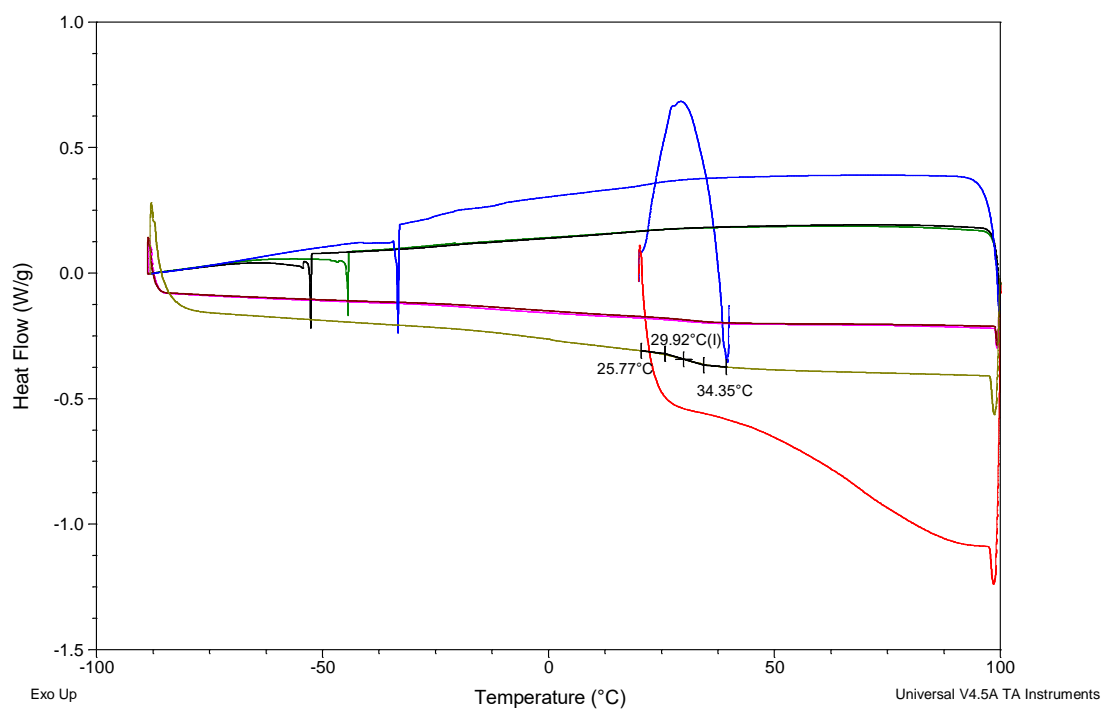

Figure S37. DSC thermogram of [HCQH<sub>2</sub>][C(SO<sub>3</sub>)<sub>2</sub>].

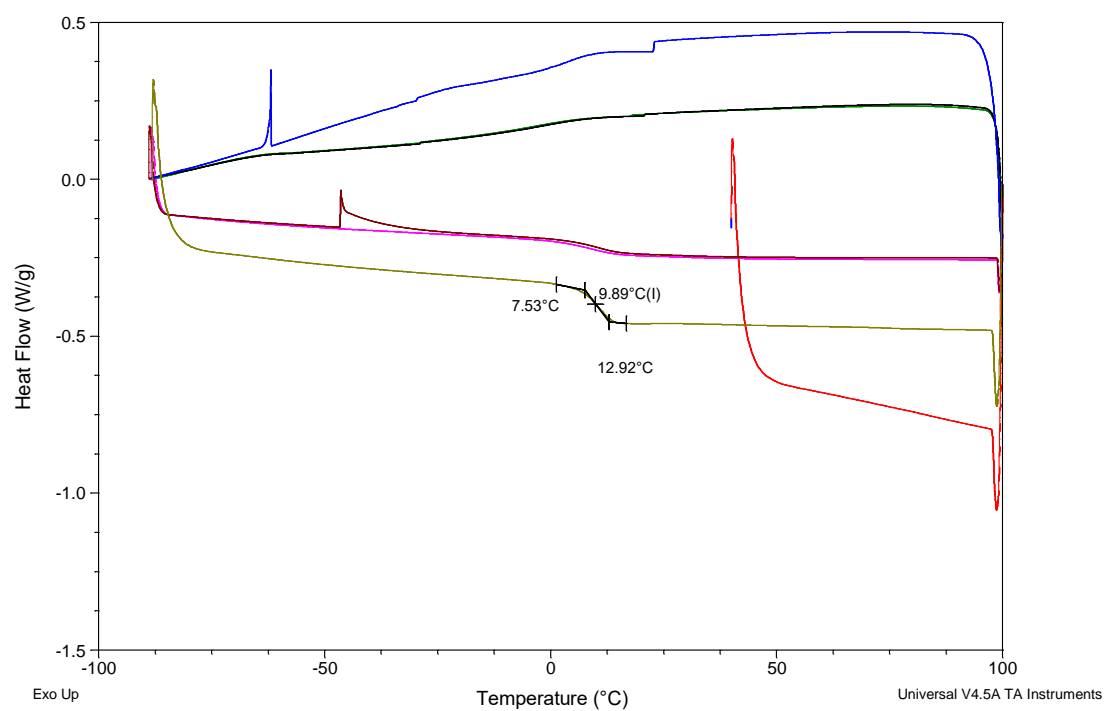

Figure S38. DSC thermogram of  $[\text{HCQH}_2][\text{C}_6\text{SO}_3]_2$ .

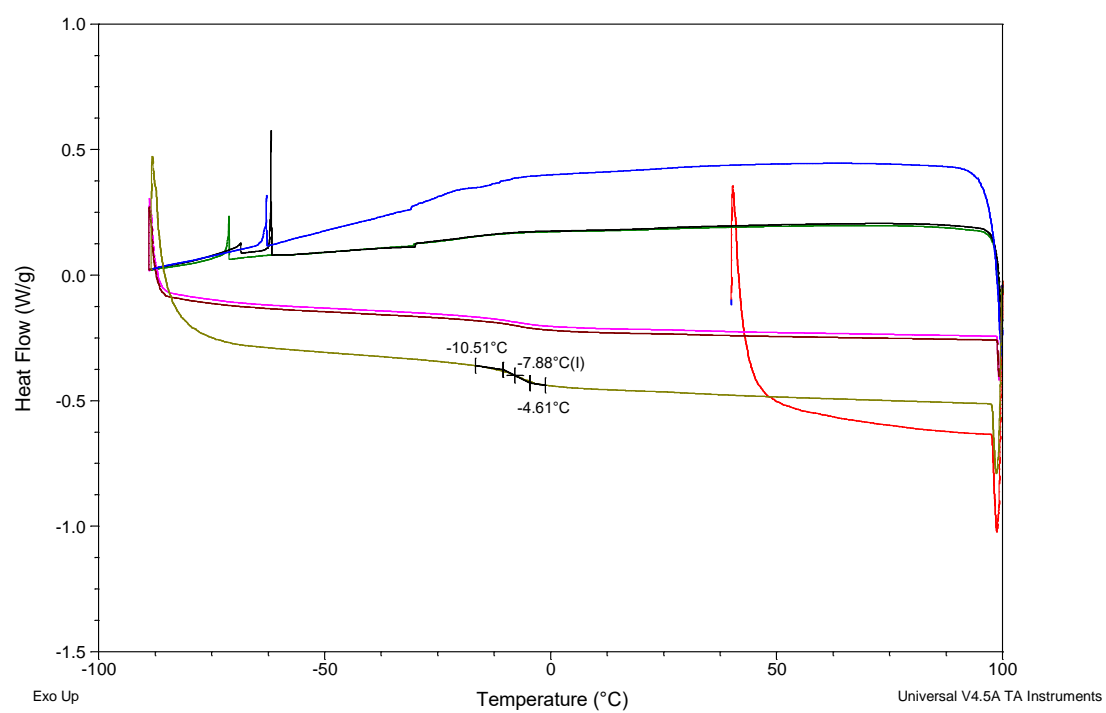

Figure S39. DSC thermogram of  $[\text{HCQH}_2][\text{DocSO}_3]_2$ .

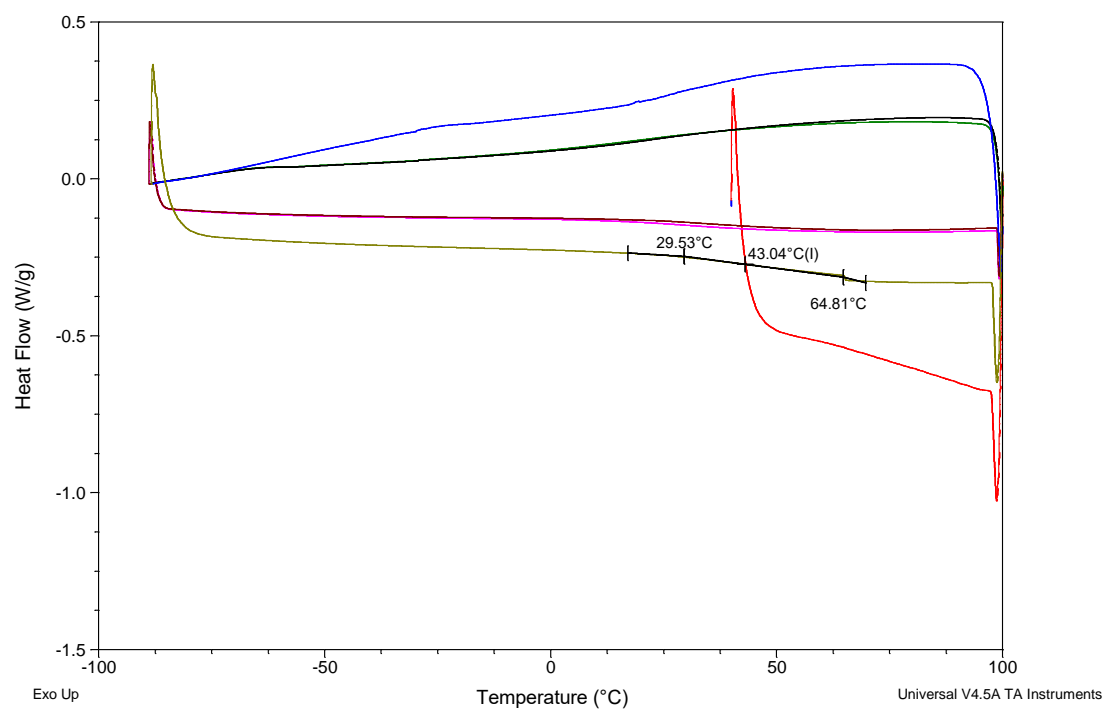

Figure S40. DSC thermogram of [HCQH<sub>2</sub>][CampSO<sub>3</sub>]<sub>2</sub>.

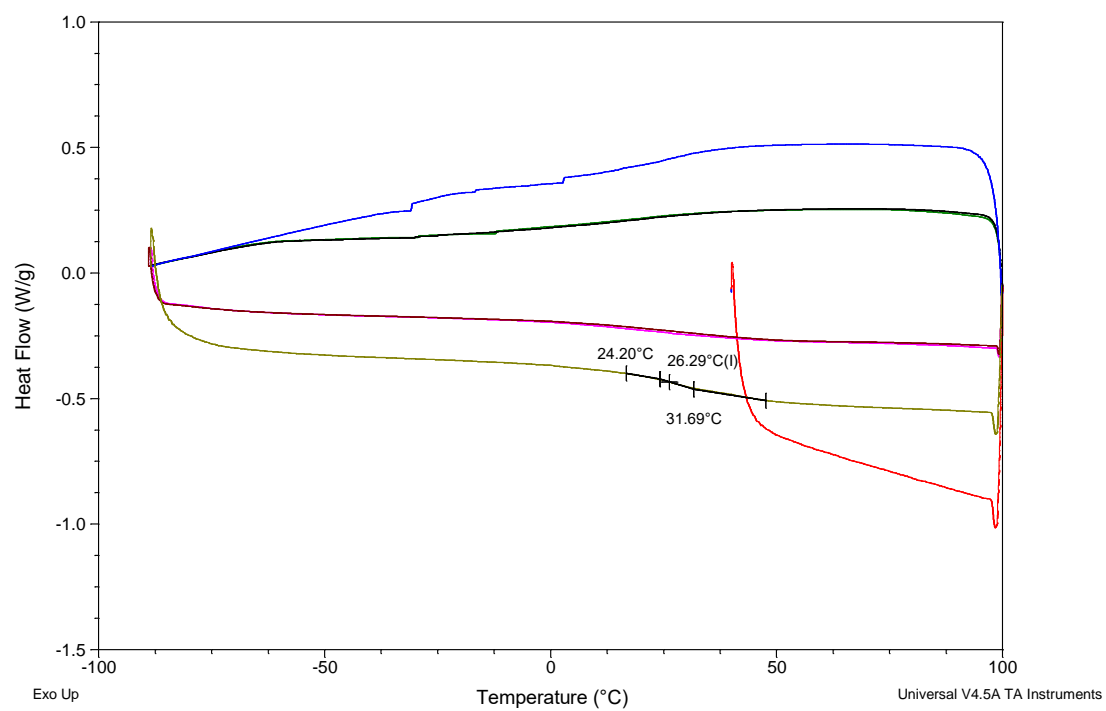

Figure S41. DSC thermogram of [HCQH<sub>2</sub>][*p*-TolSO<sub>3</sub>]<sub>2</sub>.

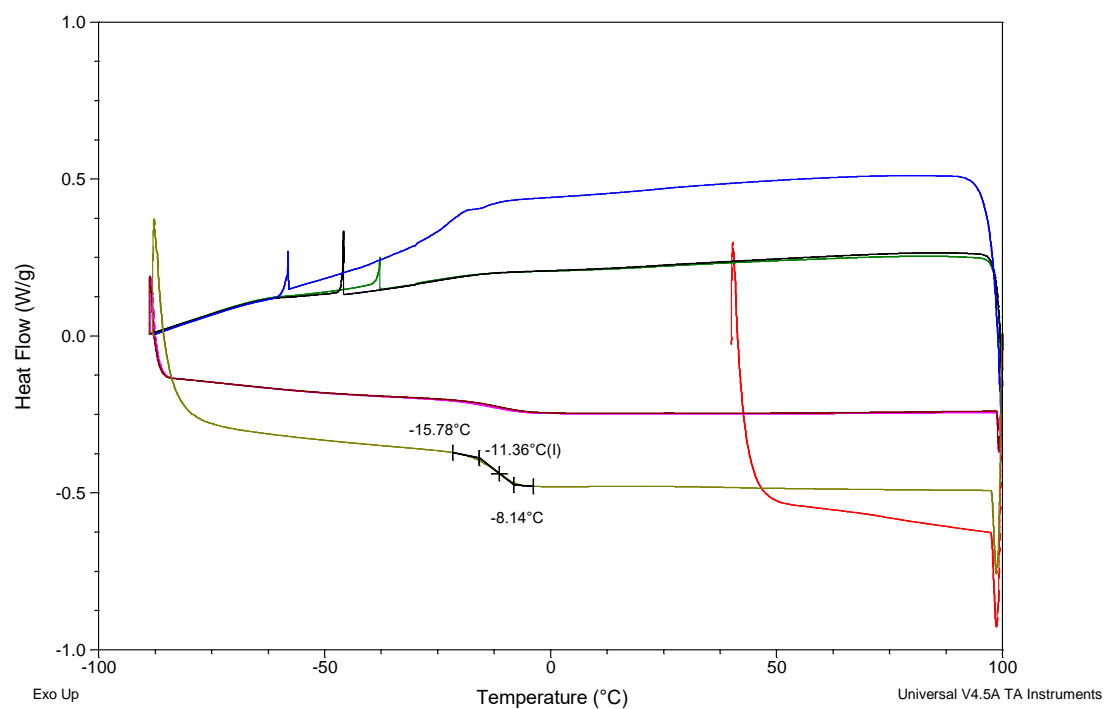

Figure S42. DSC thermogram of  $[\text{HCQH}_2][\text{C}_{12}\text{SO}_4]_2$ .

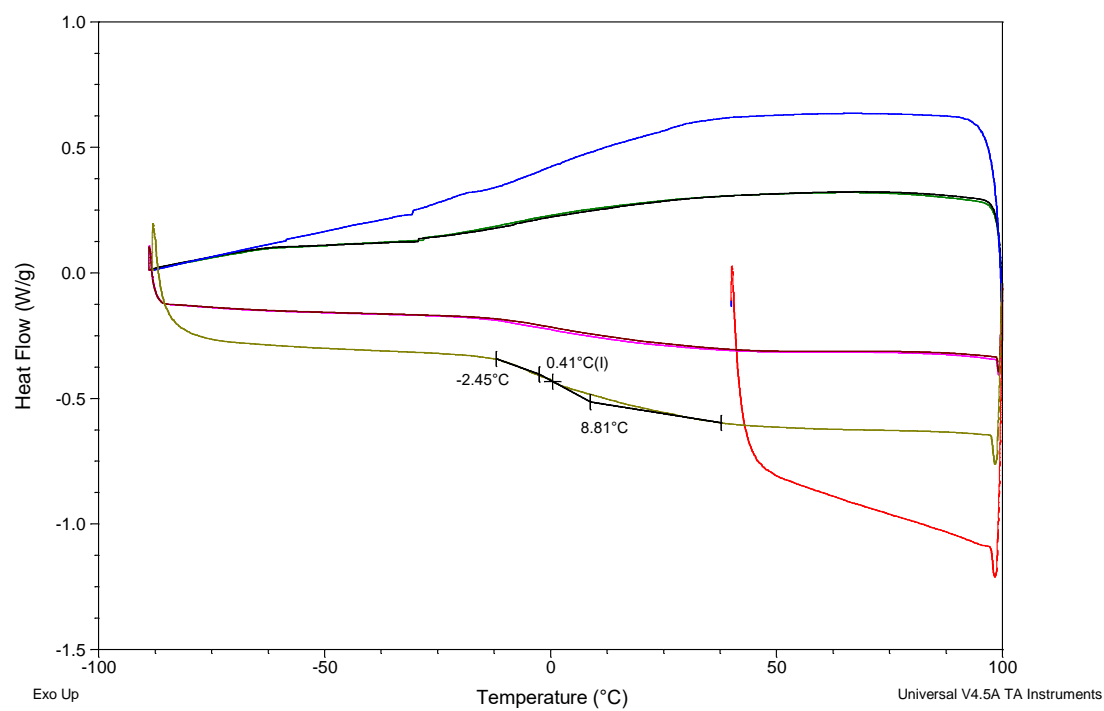

Figure S43. DSC thermogram of  $[\text{HCQH}_2][\text{GlcCOO}]_2$ .

*Critical micelle concentrations*

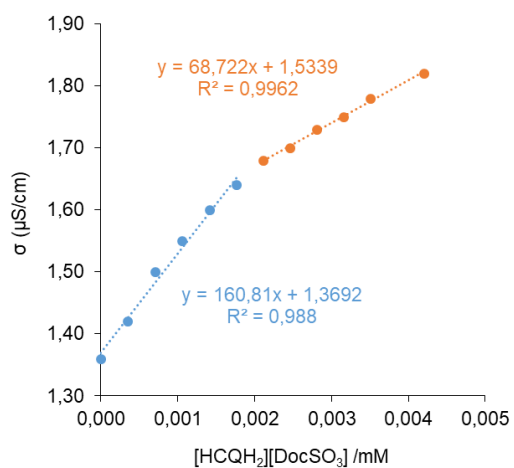

Figure S44. Plot of conductivity *vs* concentration of  $[\text{HCQH}_2][\text{DocSO}_3]_2$  (5).

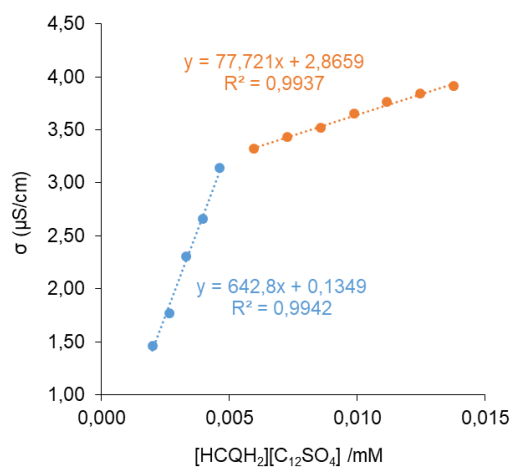

Figure S45. Plot of conductivity *vs* concentration of  $[\text{HCQH}_2][\text{C}_{12}\text{SO}_4]_2$  (8).
